# Supplementary material for: New amino acid propyl ester ibuprofenates from synthesis to use in drug delivery systems
Source: Royal Society of Chemistry journal article supplement (doi:10.1039/d2ra05804a), 2022-01-01
Supplement: d2ra05804a1.pdf [file d2ra05804a1.pdf]

## ELECTRONIC SUPPORTING INFORMATION

### New amino acid propyl ester ibuprofenates from synthesis to use in drug delivery systems

*Paula Ossowicz-Rupniewska<sup>a\*</sup>, Kaja Szczepkowska<sup>a</sup>, Paulina Bednarczyk<sup>a</sup>, Małgorzata Nowak<sup>a</sup>, Anna Nowak<sup>b</sup>, Wiktoria Duchnik<sup>b</sup>, Łukasz Kucharski<sup>b</sup>, Łukasz Struk<sup>c</sup>, Adam Klimowicz<sup>b</sup>, and Zbigniew Czech<sup>a</sup>*

<sup>a</sup> *West Pomeranian University of Technology, Szczecin, Faculty of Chemical Technology and Engineering, Department of Chemical Organic Technology and Polymeric Materials, Piastów Ave. 42, 71-065 Szczecin, Poland*

<sup>b</sup> *Pomeranian Medical University in Szczecin, Department of Cosmetic and Pharmaceutical Chemistry, Powstańców Wielkopolskich Ave. 72, 70-111 Szczecin, Poland*

<sup>c</sup> *West Pomeranian University of Technology, Szczecin, Faculty of Chemical Technology and Engineering, Department of Organic and Physical Chemistry, Piastów Ave. 42, 71-065 Szczecin, Poland*

\*Corresponding author: Tel: +48914494801. E-mail: possowicz@zut.edu.pl;

Number of pages: 28

Number of figures: 46

Number of tables: 2

## Table of Contents

### Compounds - [AAOPr][IBU]

|                                                  |     |
|--------------------------------------------------|-----|
| The NMR spectra of [AAOPr][IBU]                  | S2  |
| The ATR-FTIR spectra of [AAOPr][IBU]             | S7  |
| The TG curves of [AAOPr][IBU]                    | S9  |
| The DSC curves of [AAOPr][IBU]                   | S11 |
| X-ray diffraction (XRD) patterns of [AAOPr][IBU] | S13 |
| Skin permeation results                          | S15 |

### Transdermal patches

|                                 |     |
|---------------------------------|-----|
| The ATR-FTIR spectra of patches | S18 |
| The TG curves of patches        | S21 |
| The DSC curves of patches       | S24 |
| Skin permeation results         | S27 |

# COMPOUNDS - [AAOPr][IBU]

## The NMR spectra of [AAOPr][IBU]

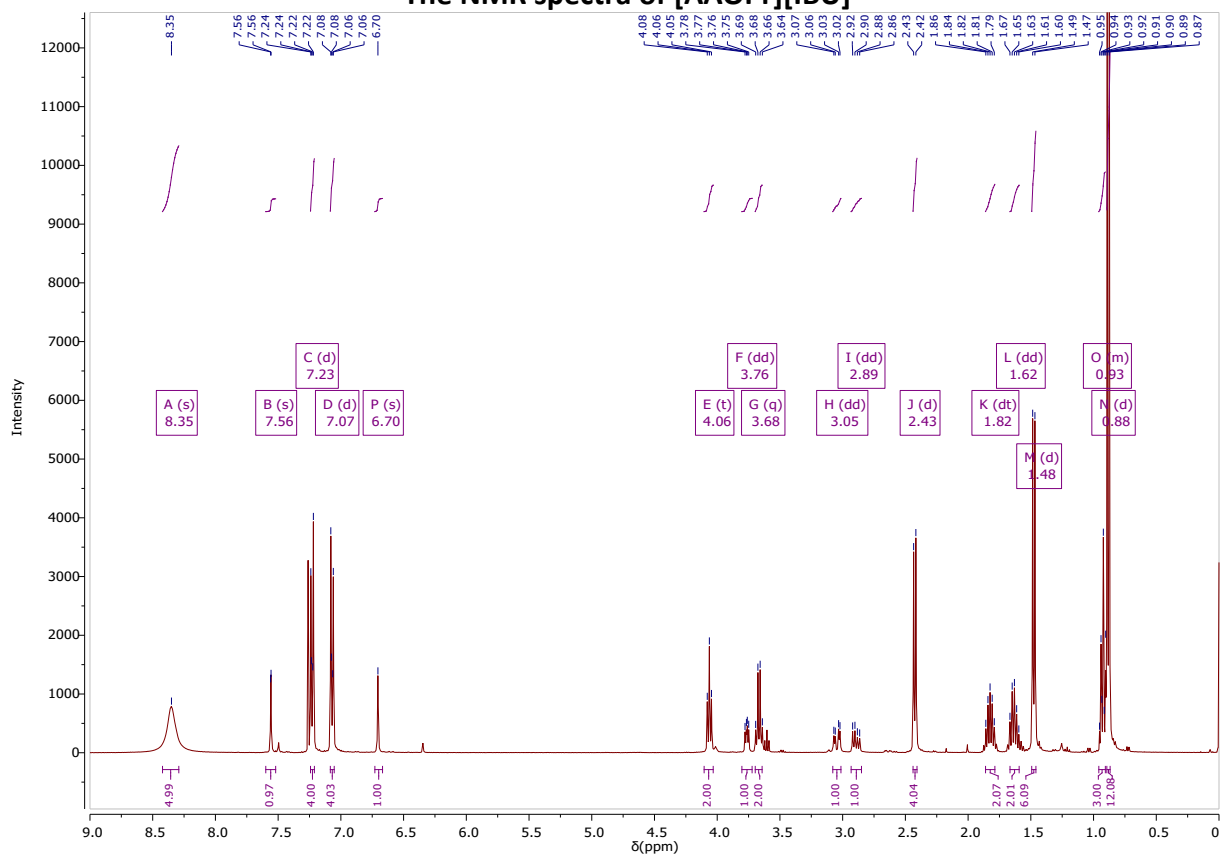

Figure S1. <sup>1</sup>H NMR spectrum of L-histidine propyl ester bis(ibuprofenate).

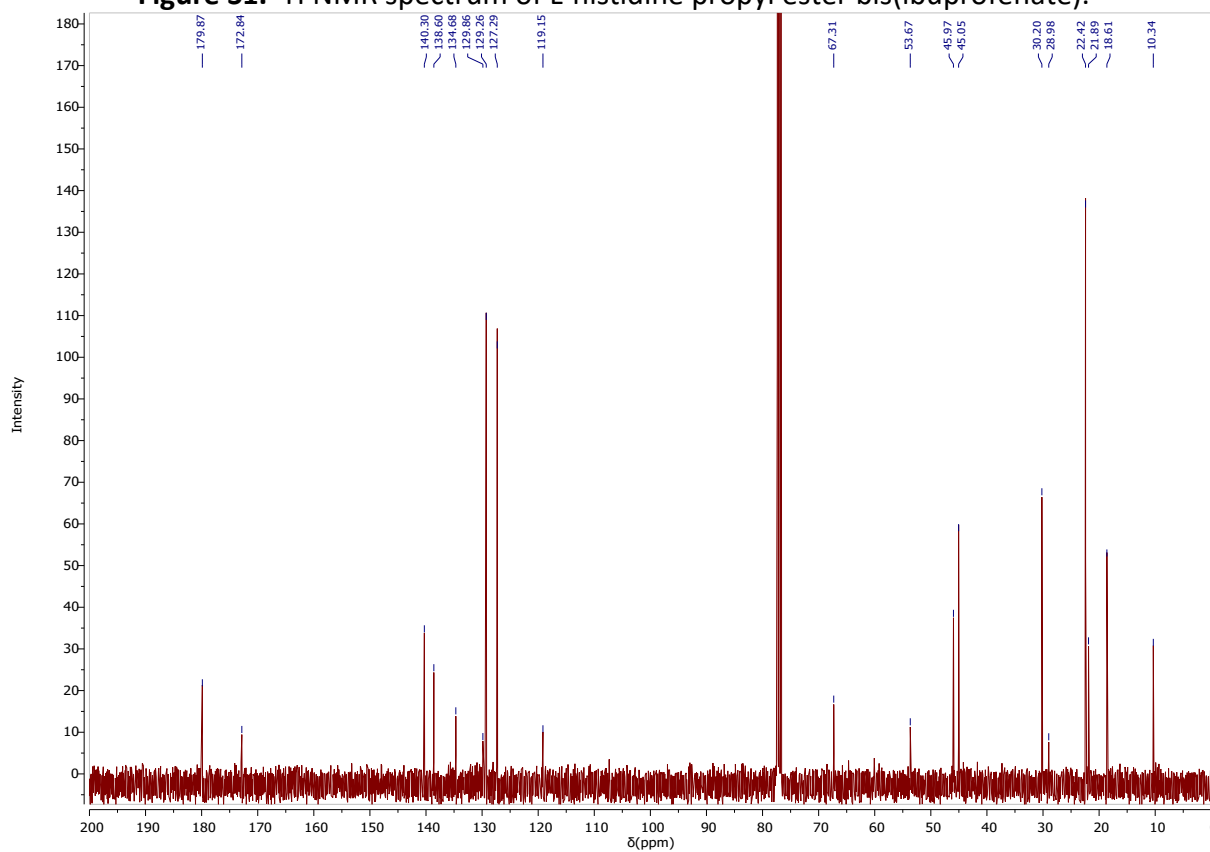

Figure S2. <sup>13</sup>C NMR spectrum of L-histidine propyl ester bis(ibuprofenate).

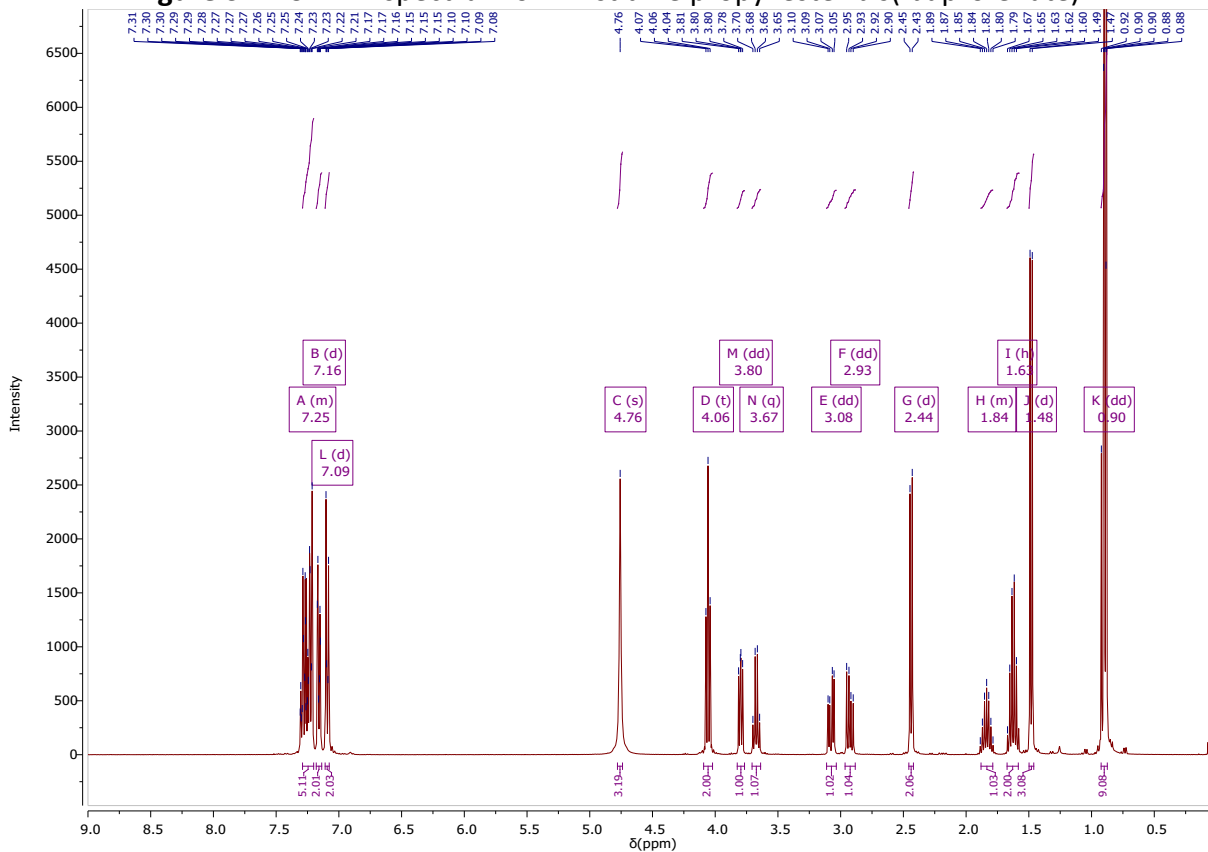

Figure S3. <sup>1</sup>H NMR spectrum of L-phenylalanine propyl ester ibuprofenate.

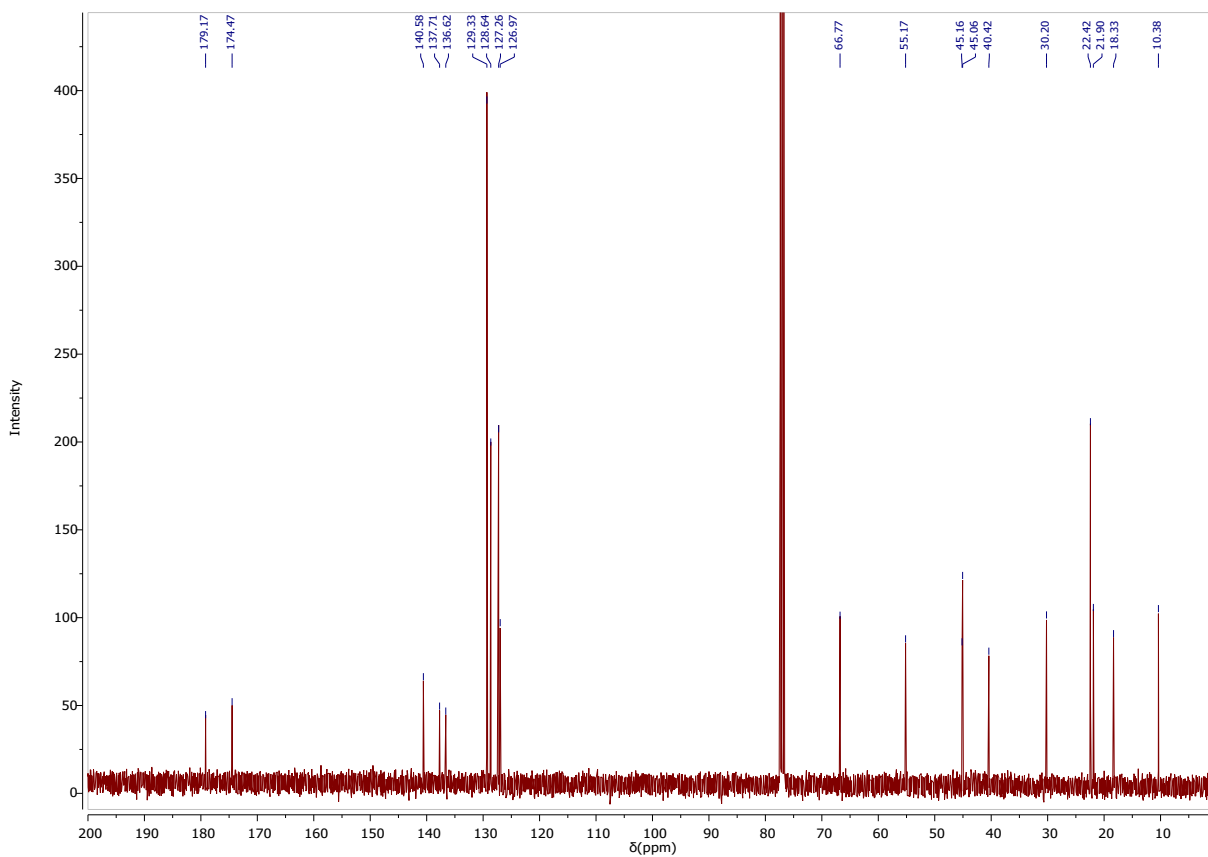

Figure S4. <sup>13</sup>C NMR spectrum of L-phenylalanine propyl ester ibuprofenate.

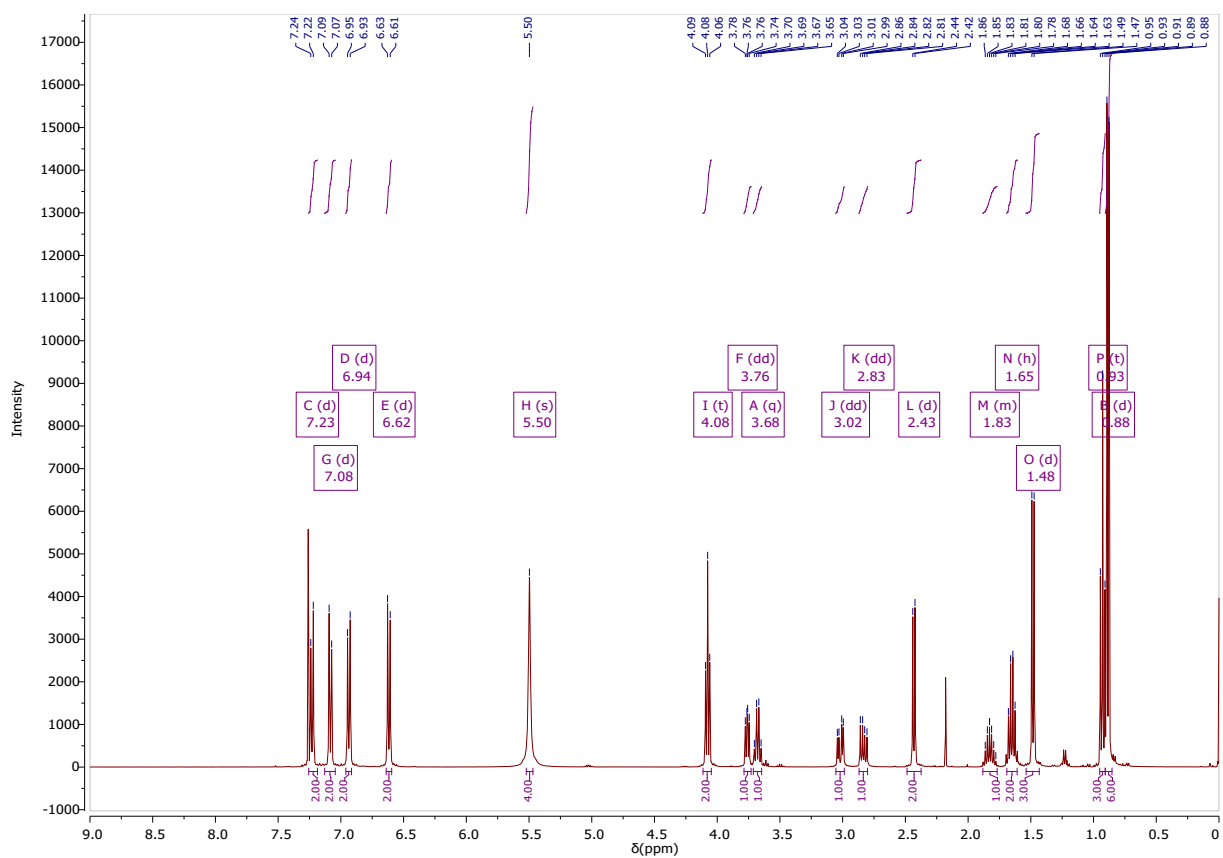

Figure S5. <sup>1</sup>H NMR spectrum of L-tyrosine propyl ester ibuprofenate.

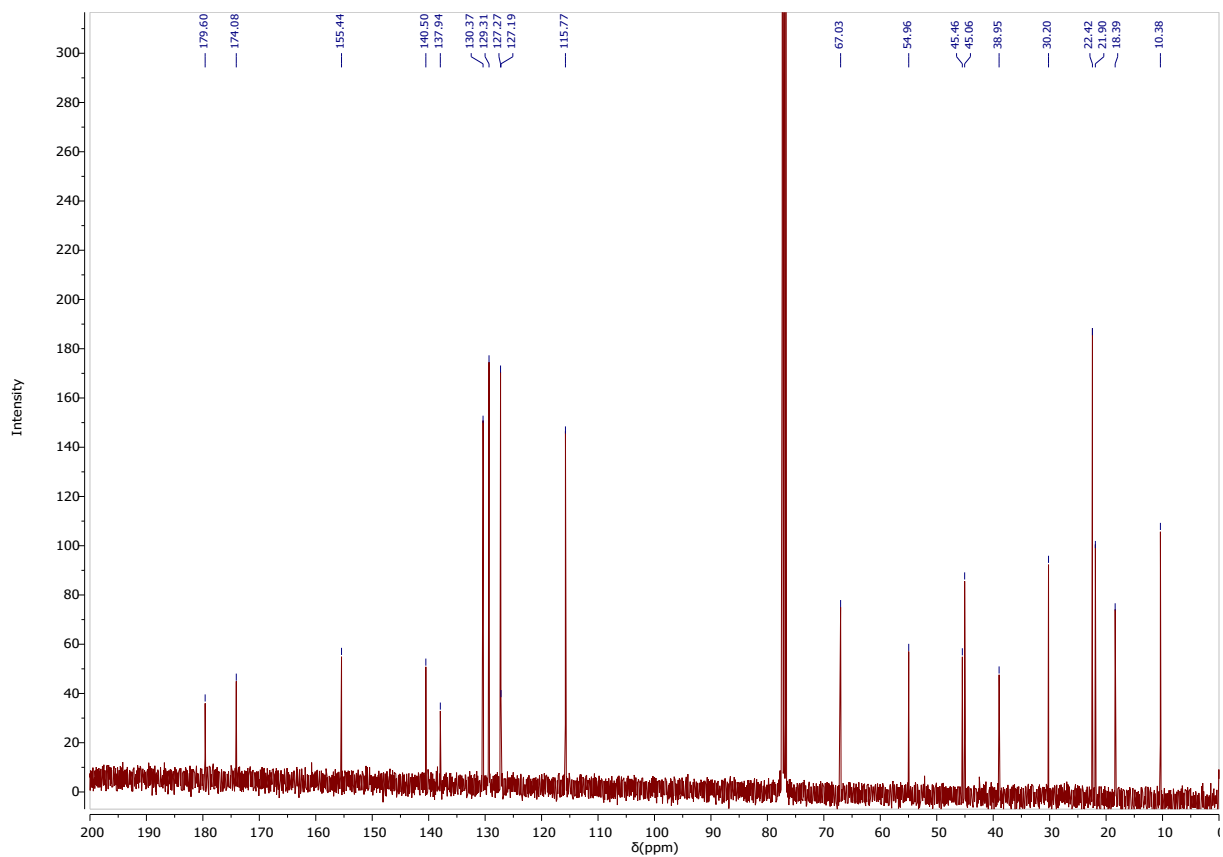

Figure S6. <sup>13</sup>C NMR spectrum of L-tyrosine propyl ester ibuprofenate.

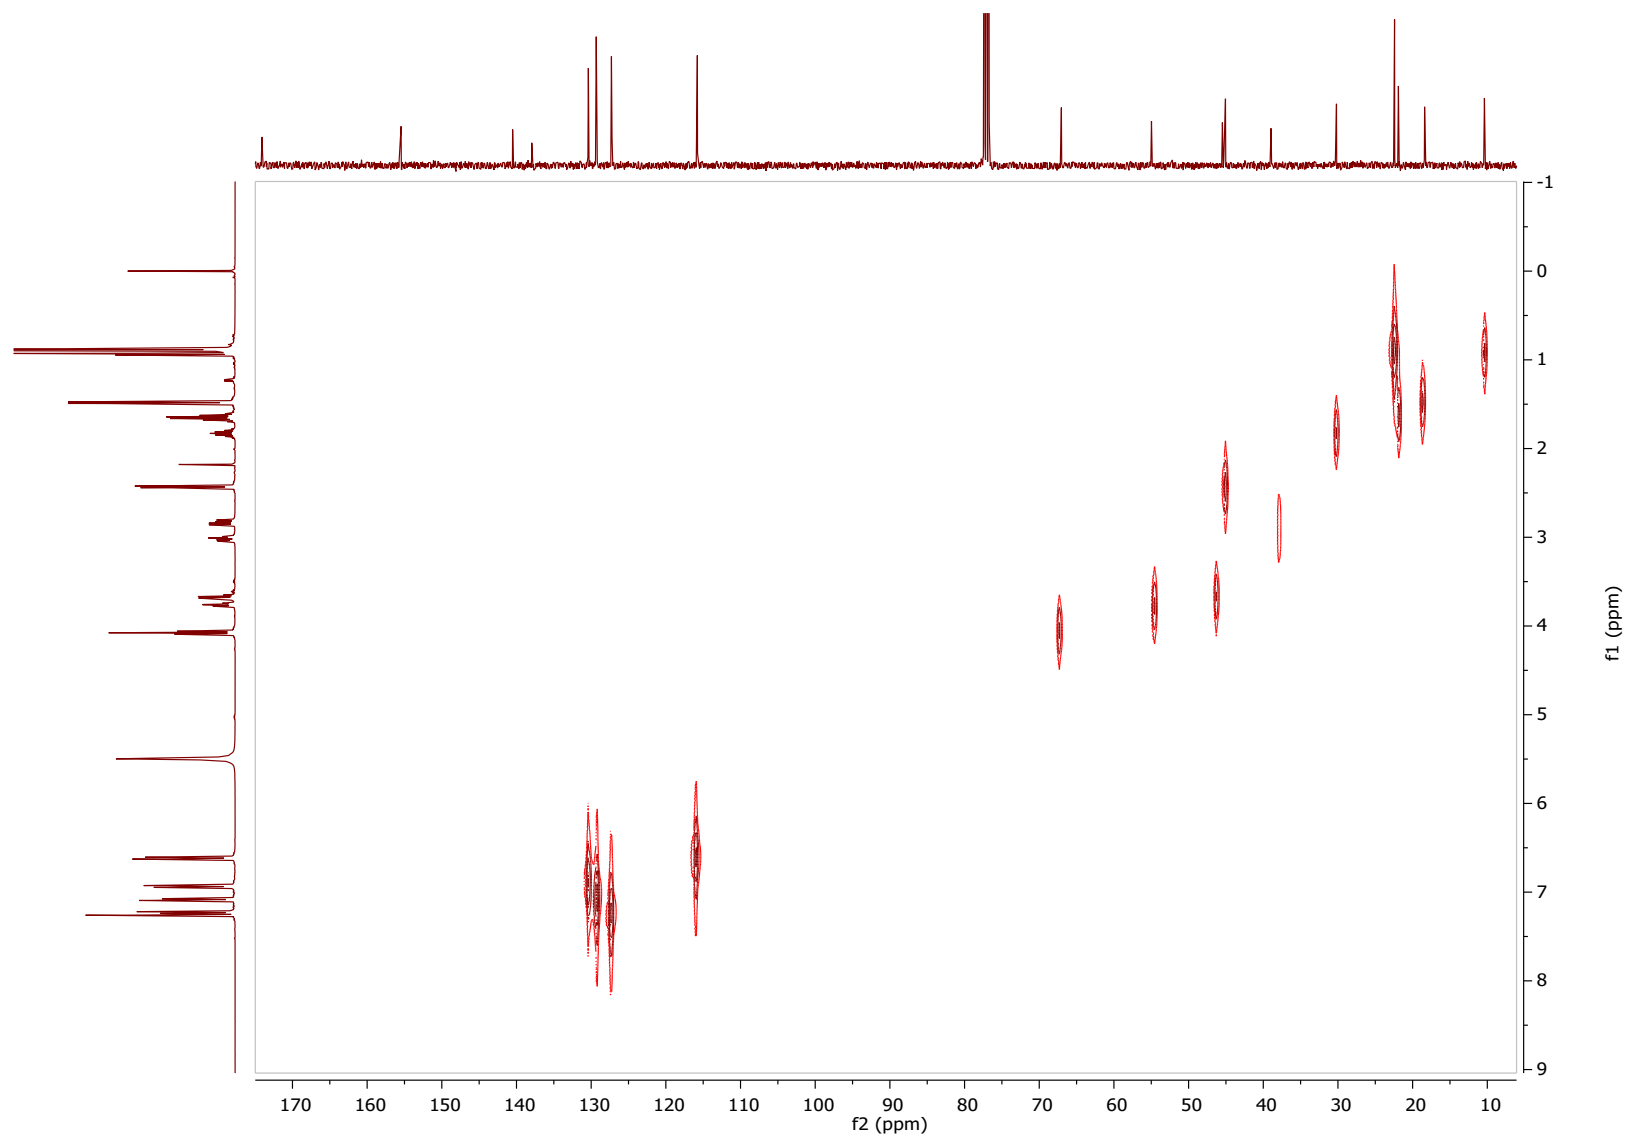

**Figure S7.**  $^1\text{H}$ - $^{13}\text{C}$  COSY NMR spectrum of L-tyrosine propyl ester ibuprofenate.

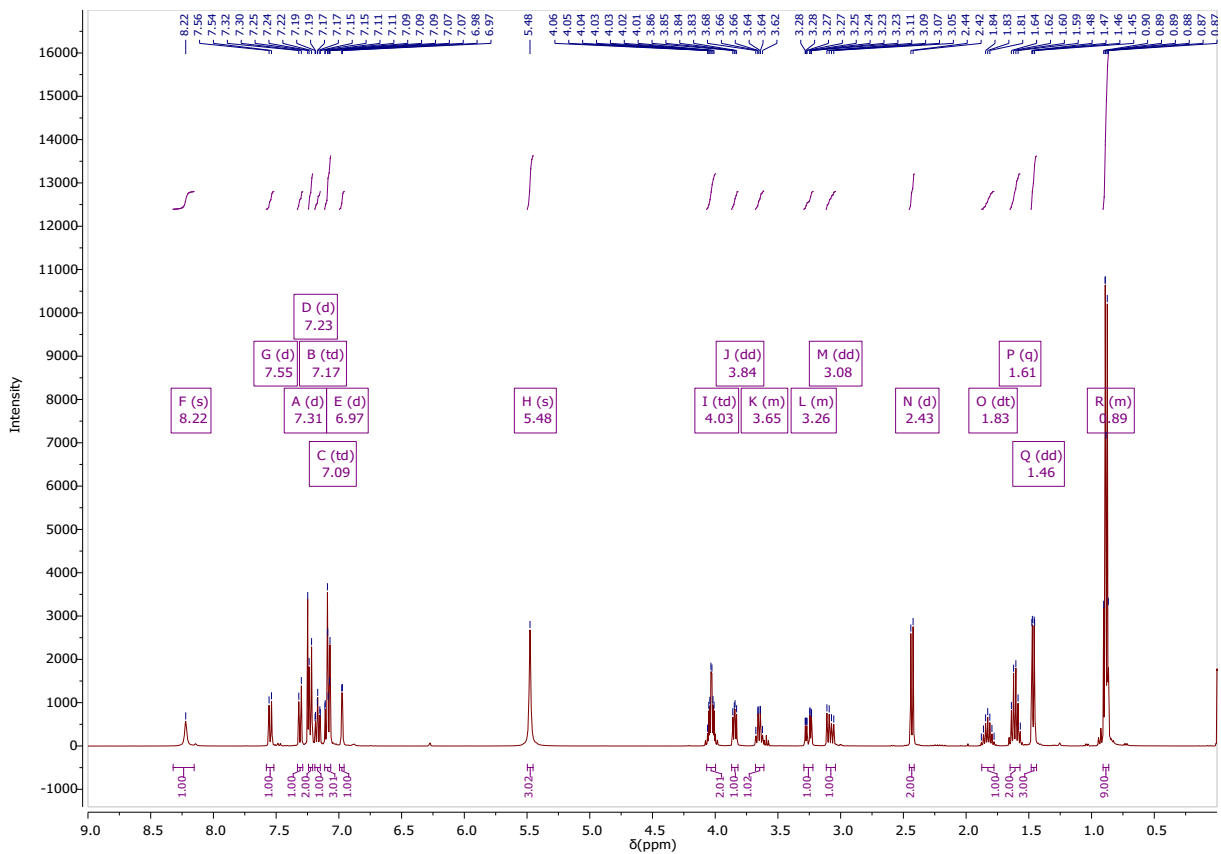

Figure S8. <sup>1</sup>H NMR spectrum of L-tryptophane propyl ester ibuprofenate.

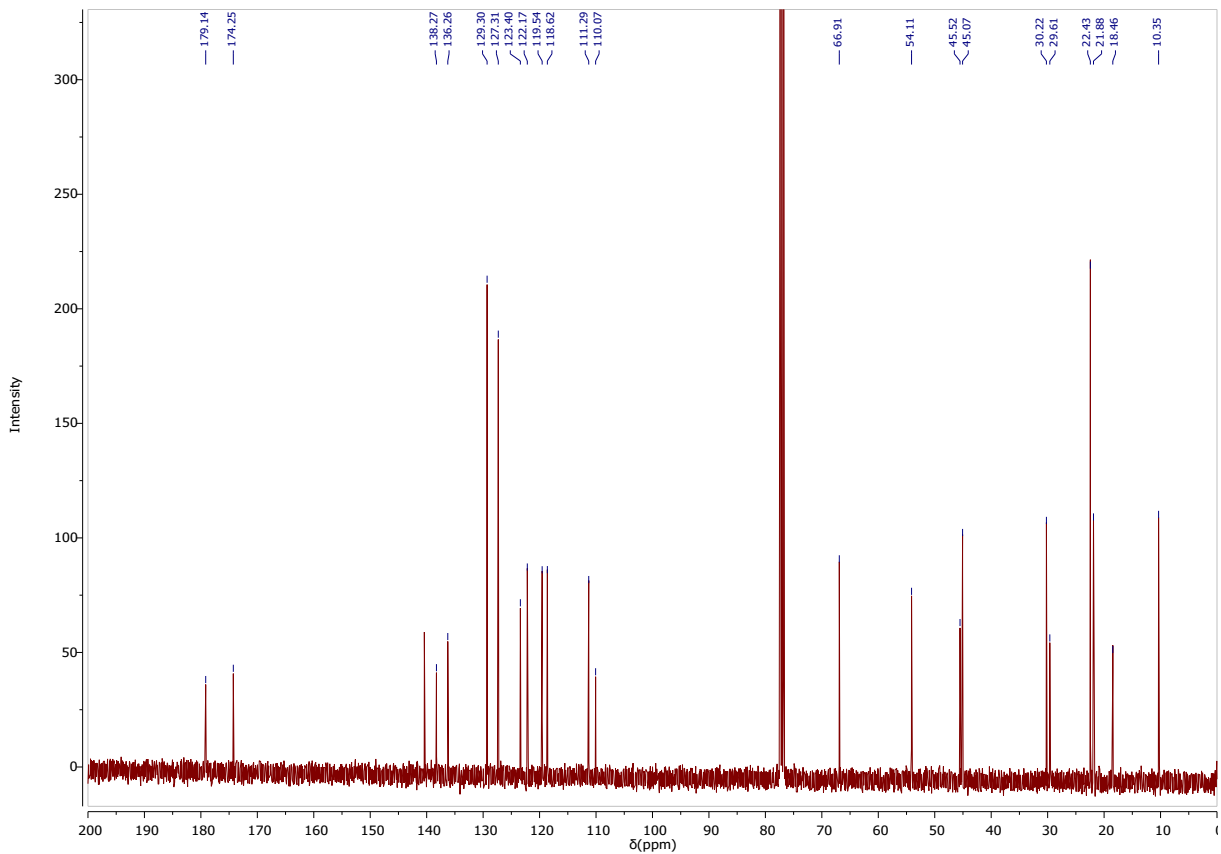

Figure S9. <sup>13</sup>C NMR spectrum of L-tryptophane propyl ester ibuprofenate.

### The ATR-FTIR spectra of [AAOiPr][IBU]

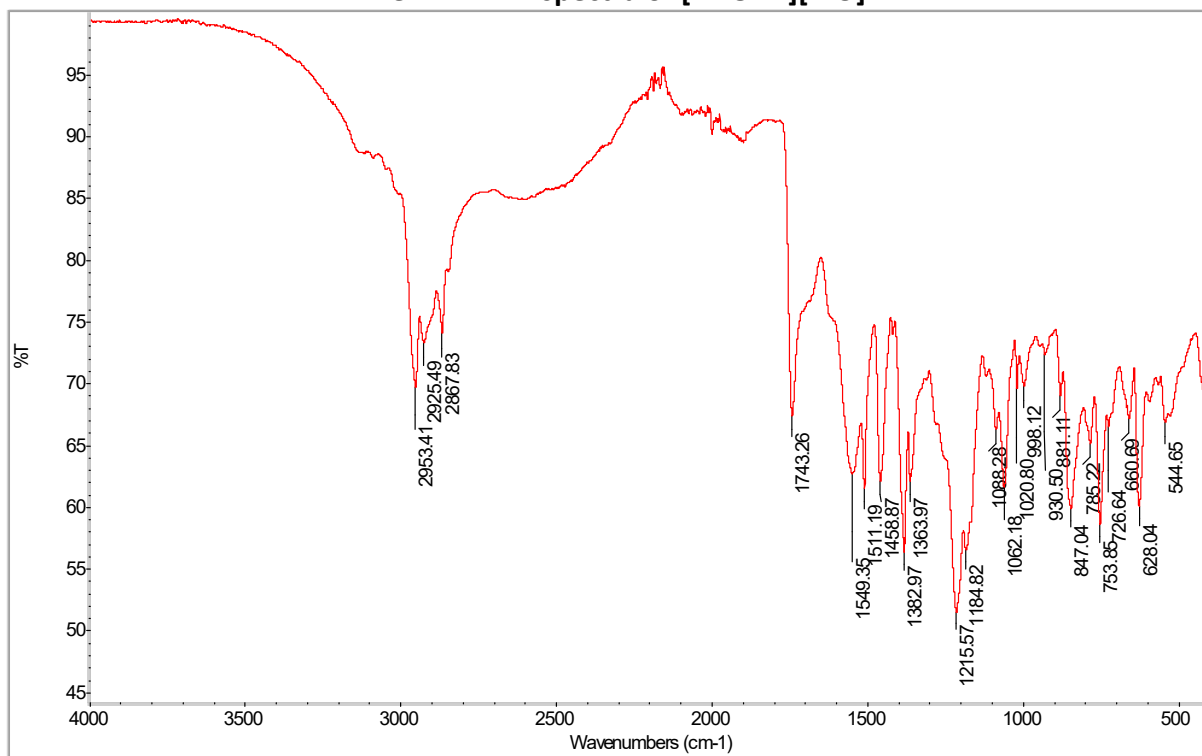

Figure S10. FTIR spectrum of L-histidine propyl ester bis(ibuprofenate).

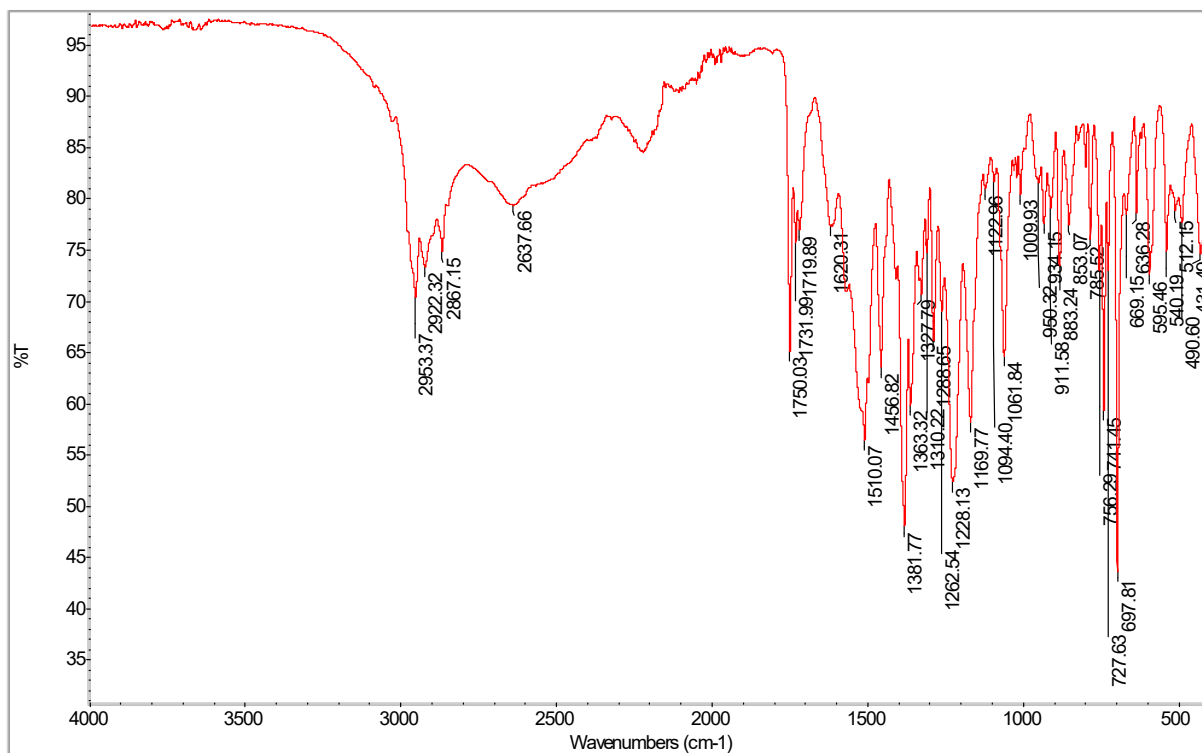

Figure S11. FTIR spectrum of L-phenylalanine propyl ester ibuprofenate.

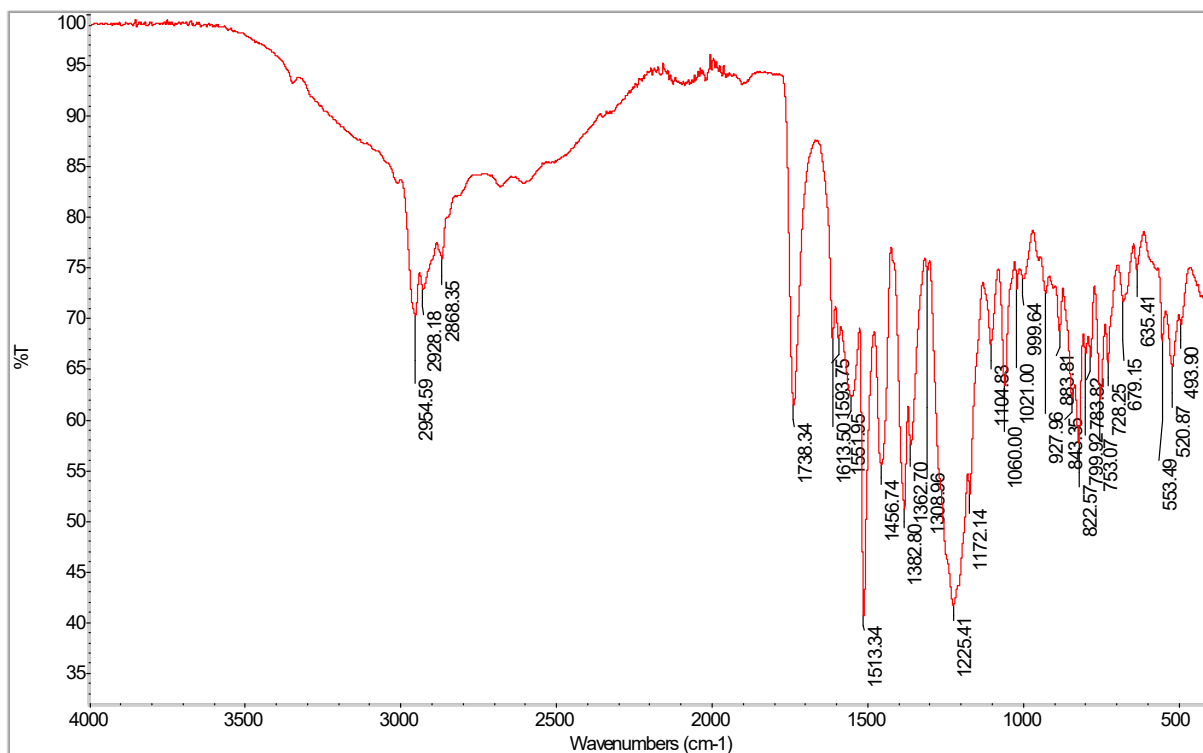

Figure S12. FTIR spectrum of L-tyrosine propyl ester ibuprofenate.

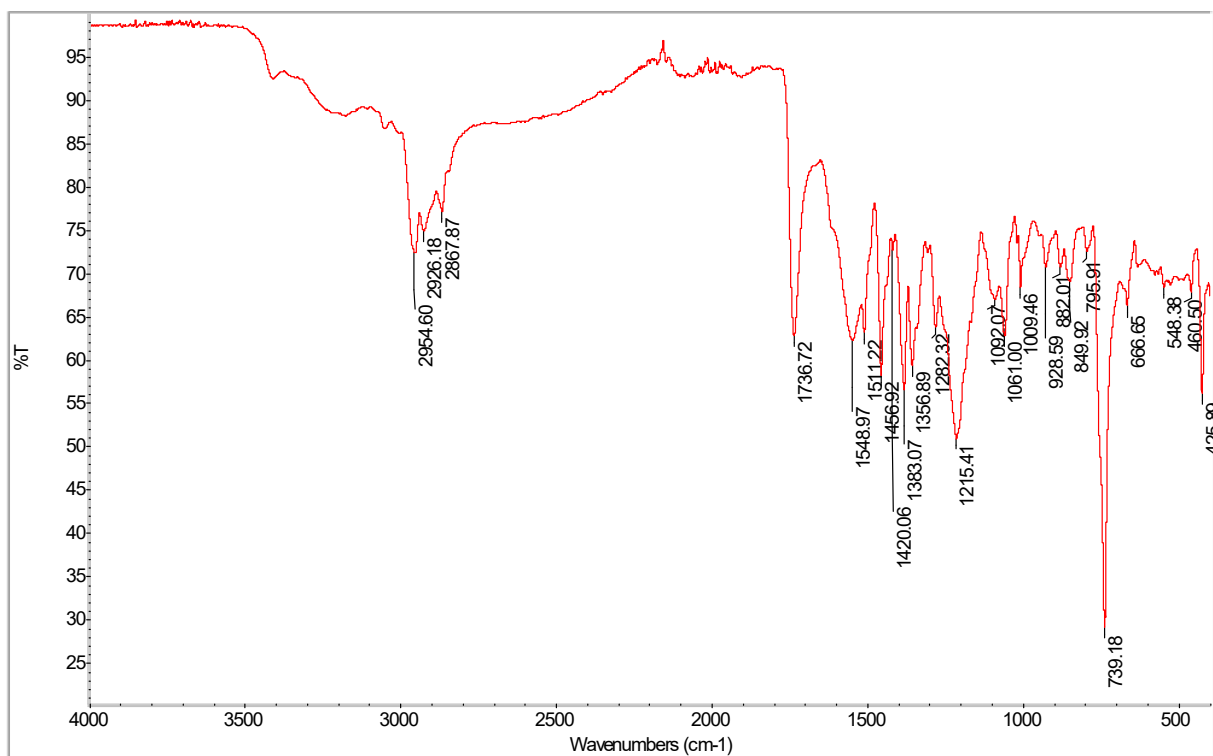

Figure S13. FTIR spectrum of L-tryptophane propyl ester ibuprofenate.



### The TG curves of [AAOPr][IBU]

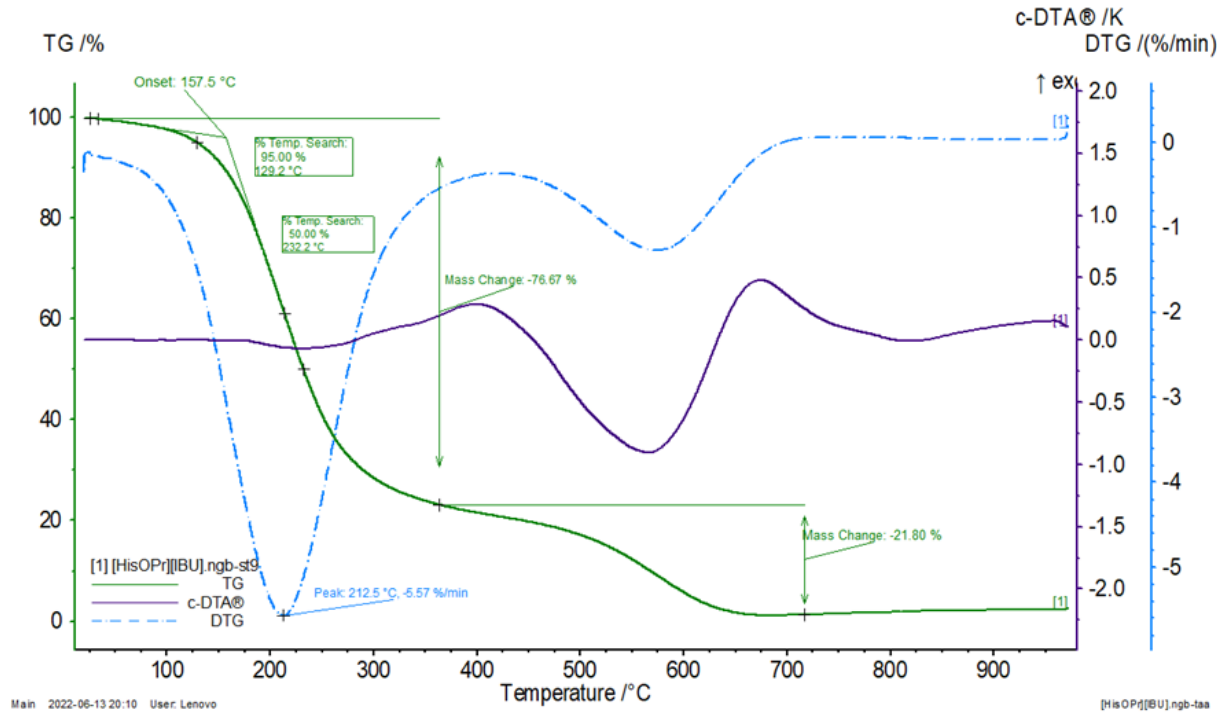

**Figure S14.** The TG, DTG, and c-DTA curves of L-histidine propyl ester bis(ibuprofenate).

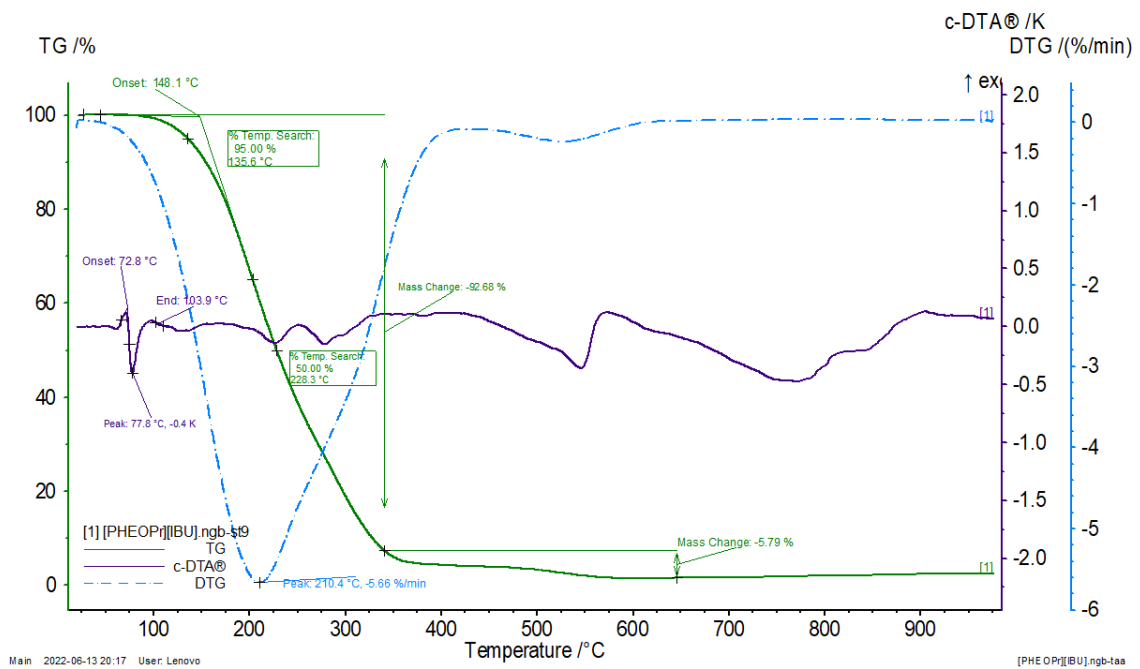

**Figure S15.** The TG, DTG, and c-DTA curves of L-phenylalanine propyl ester ibuprofenate.

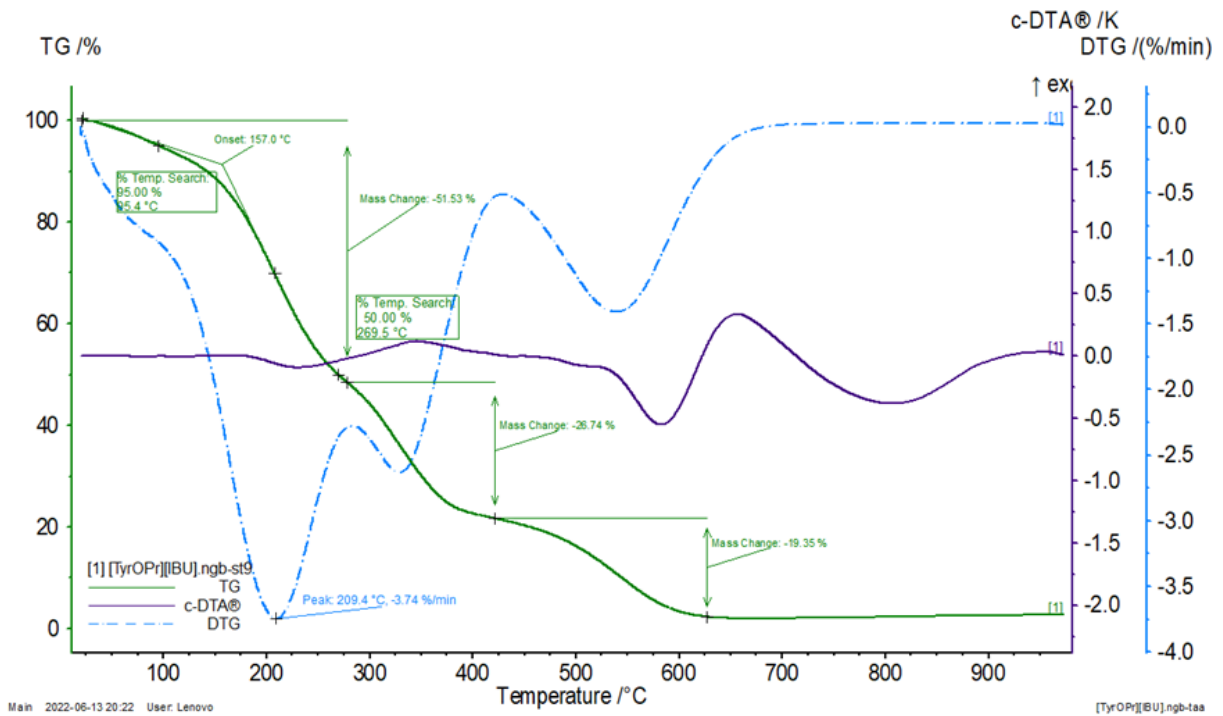

**Figure S16.** The TG, DTG, and c-DTA curves of L-tyrosine propyl ester ibuprofenate.

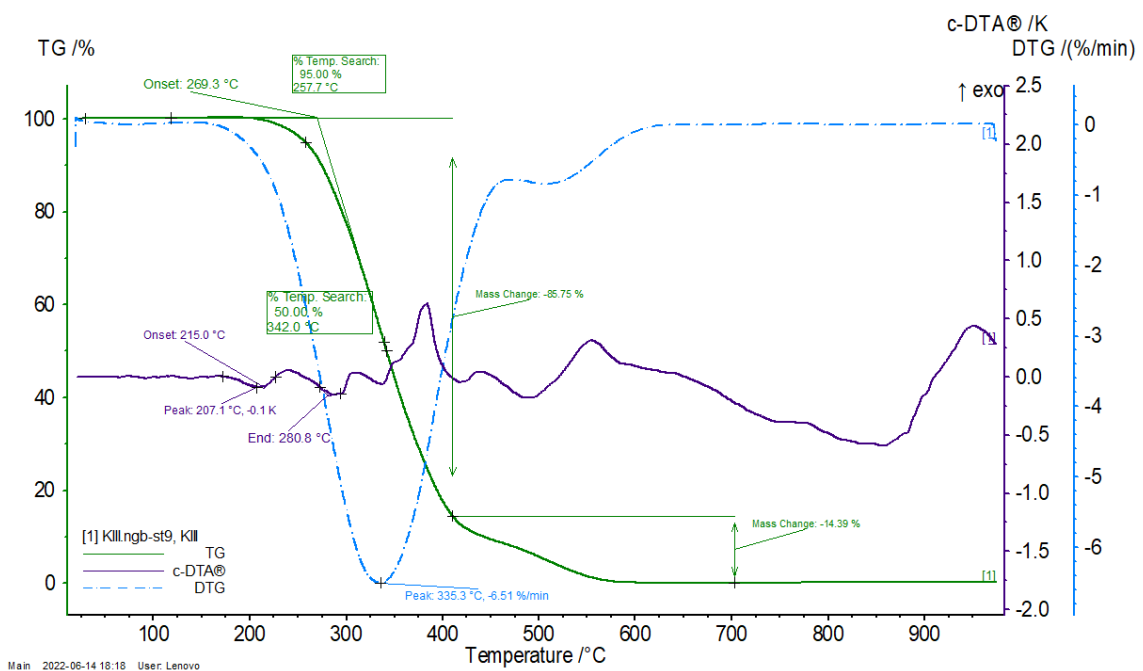

**Figure S17.** The TG, DTG, and c-DTA curves of L-tryptophan propyl ester ibuprofenate.

### The DSC curves of [AAOPr][IBU]

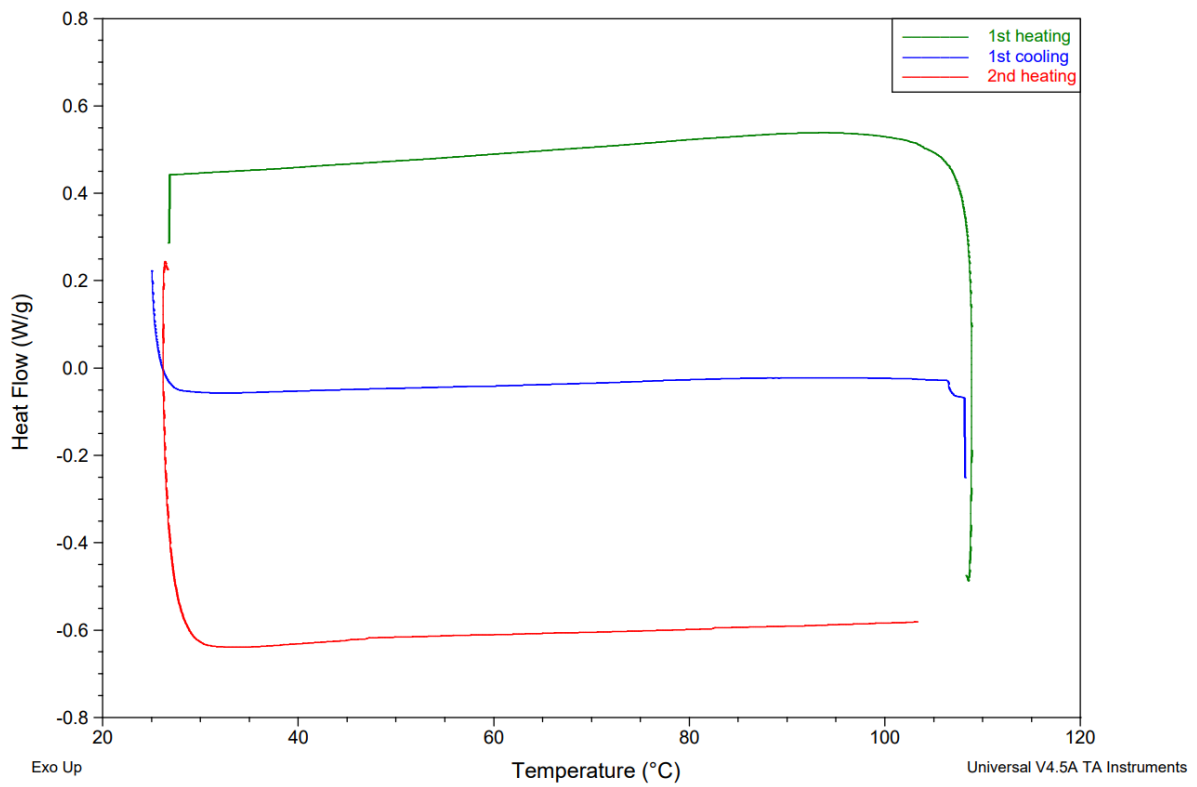

**Figure S18.** The DSC curves of L-histidine propyl ester bis(ibuprofenate).

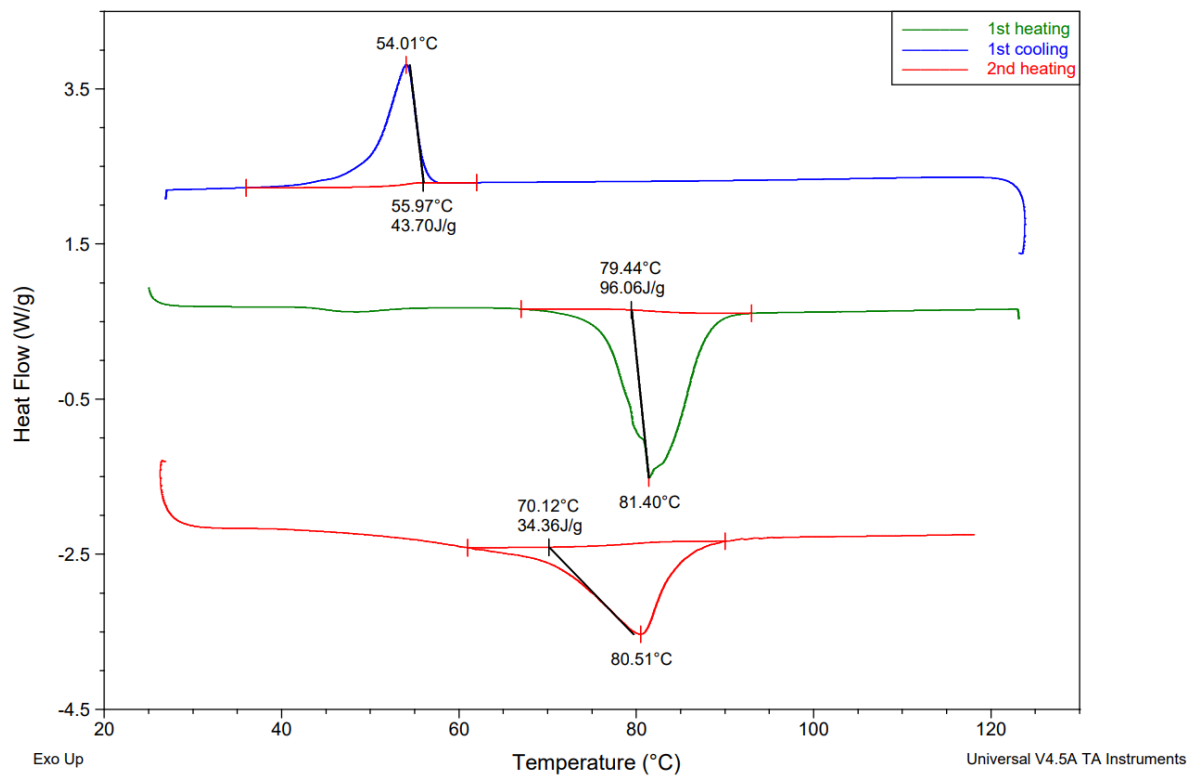

**Figure S19.** The DSC curves of L-phenylalanine propyl ester ibuprofenate.

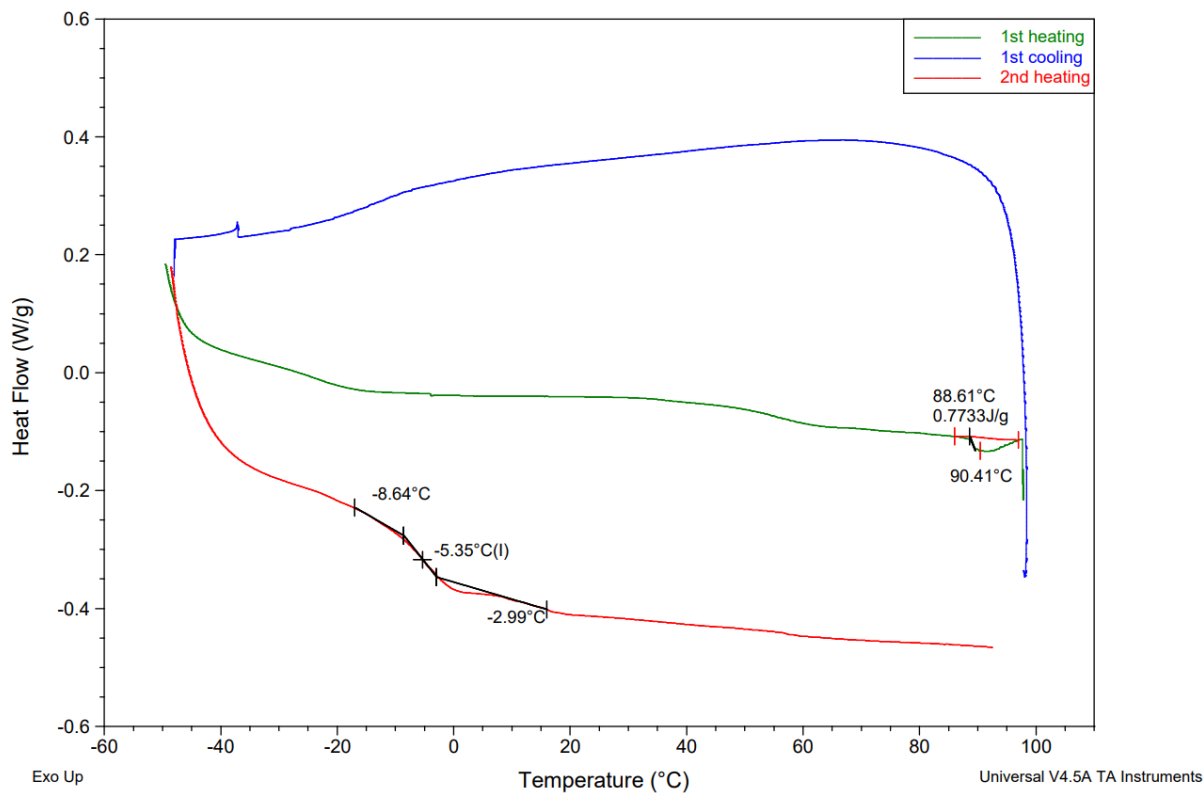

**Figure S20.** The DSC curves of L-tyrosine propyl ester ibuprofenate.

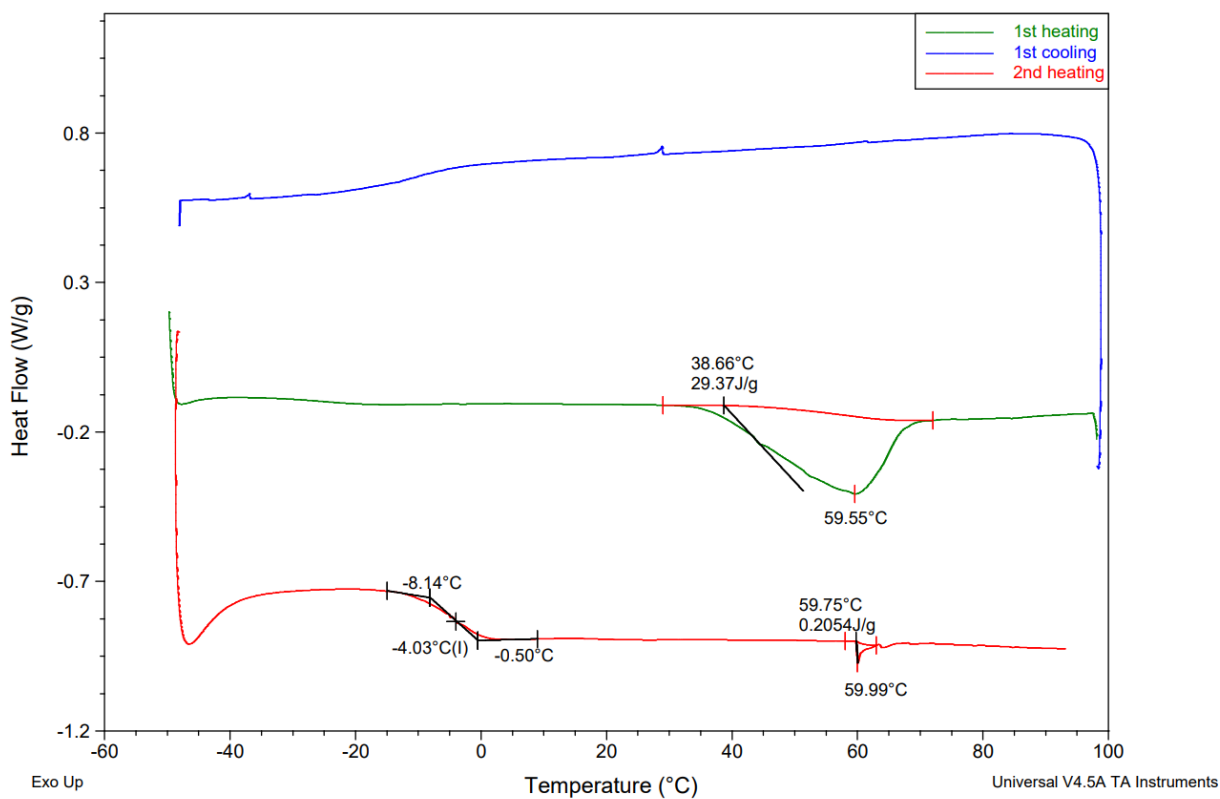

**Figure S21.** The DSC curves of L-tryptophane propyl ester ibuprofenate.

**X-ray diffraction (XRD) patterns of [AAOPr][IBU]**

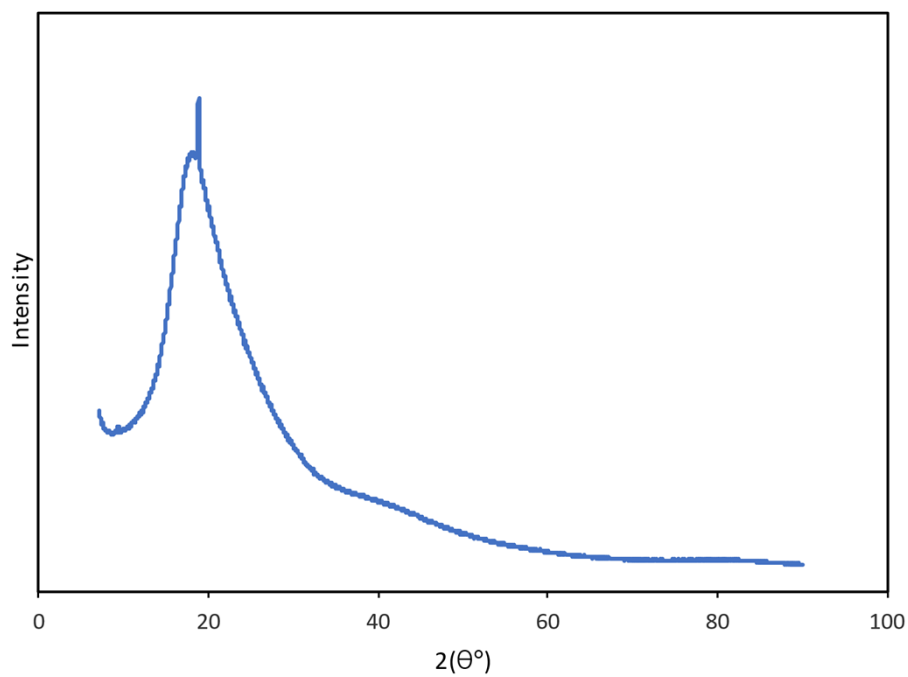

**Figure S22.** XRD pattern of L-histidine propyl ester bis(ibuprofenate).

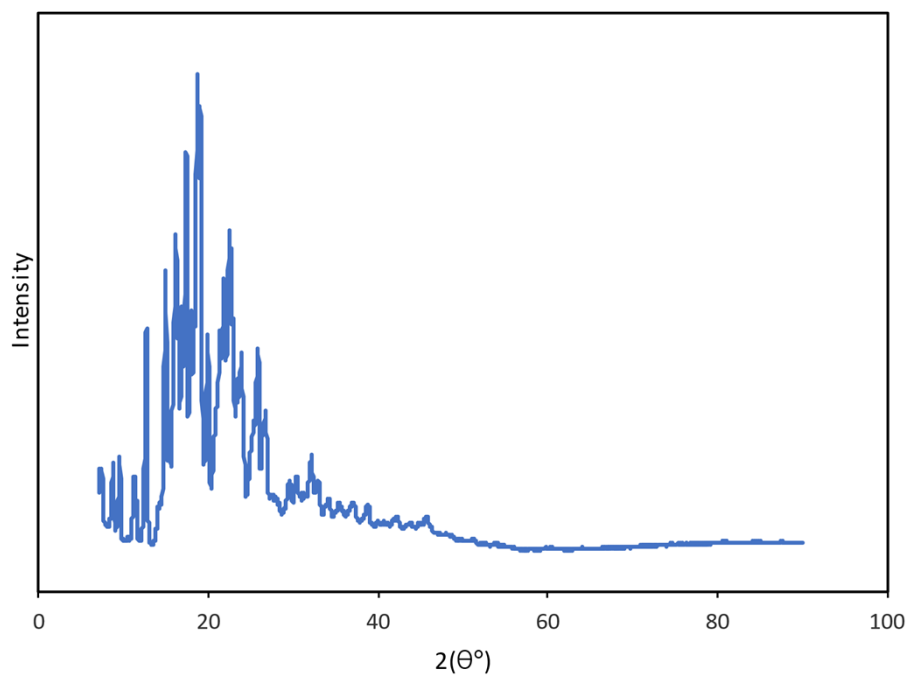

**Figure S23.** XRD pattern of L-phenylalanine propyl ester ibuprofenate.

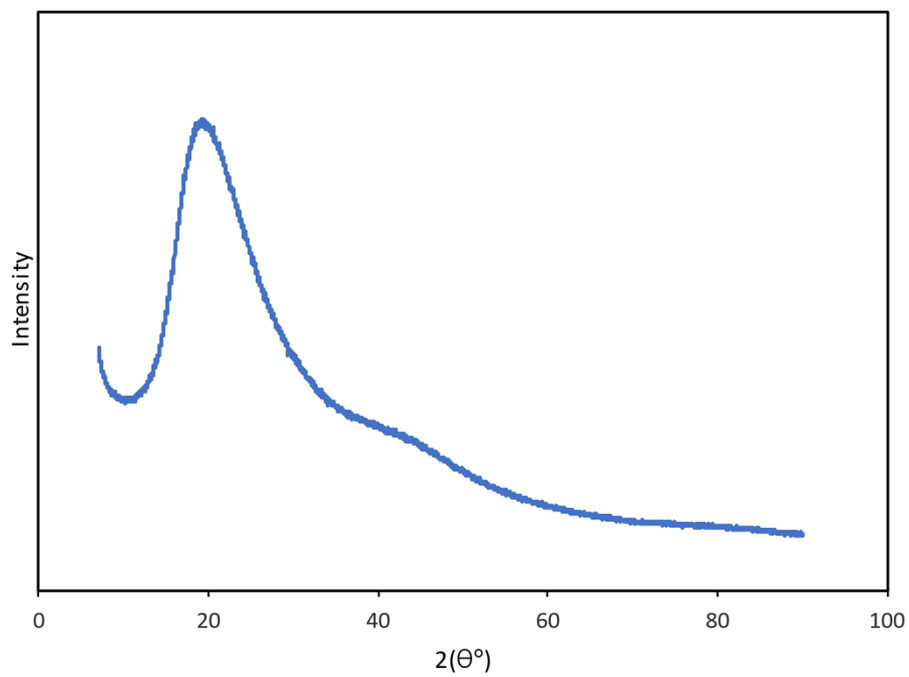

**Figure S24.** XRD pattern of L-tyrosine propyl ester ibuprofenate.

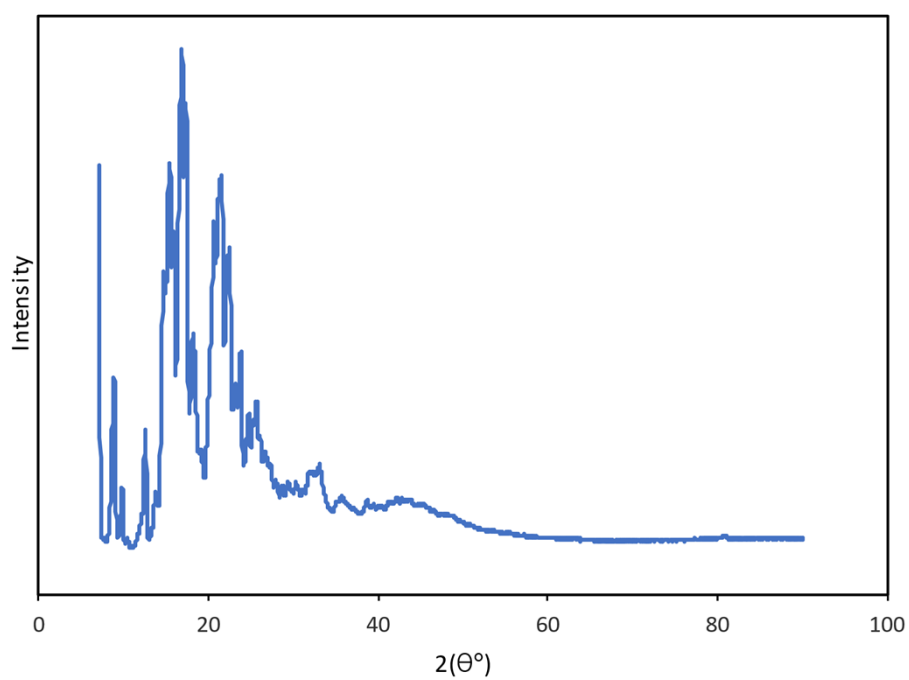

**Figure S25.** XRD pattern of L-tryptophan propyl ester ibuprofenate.

### Skin permeation results

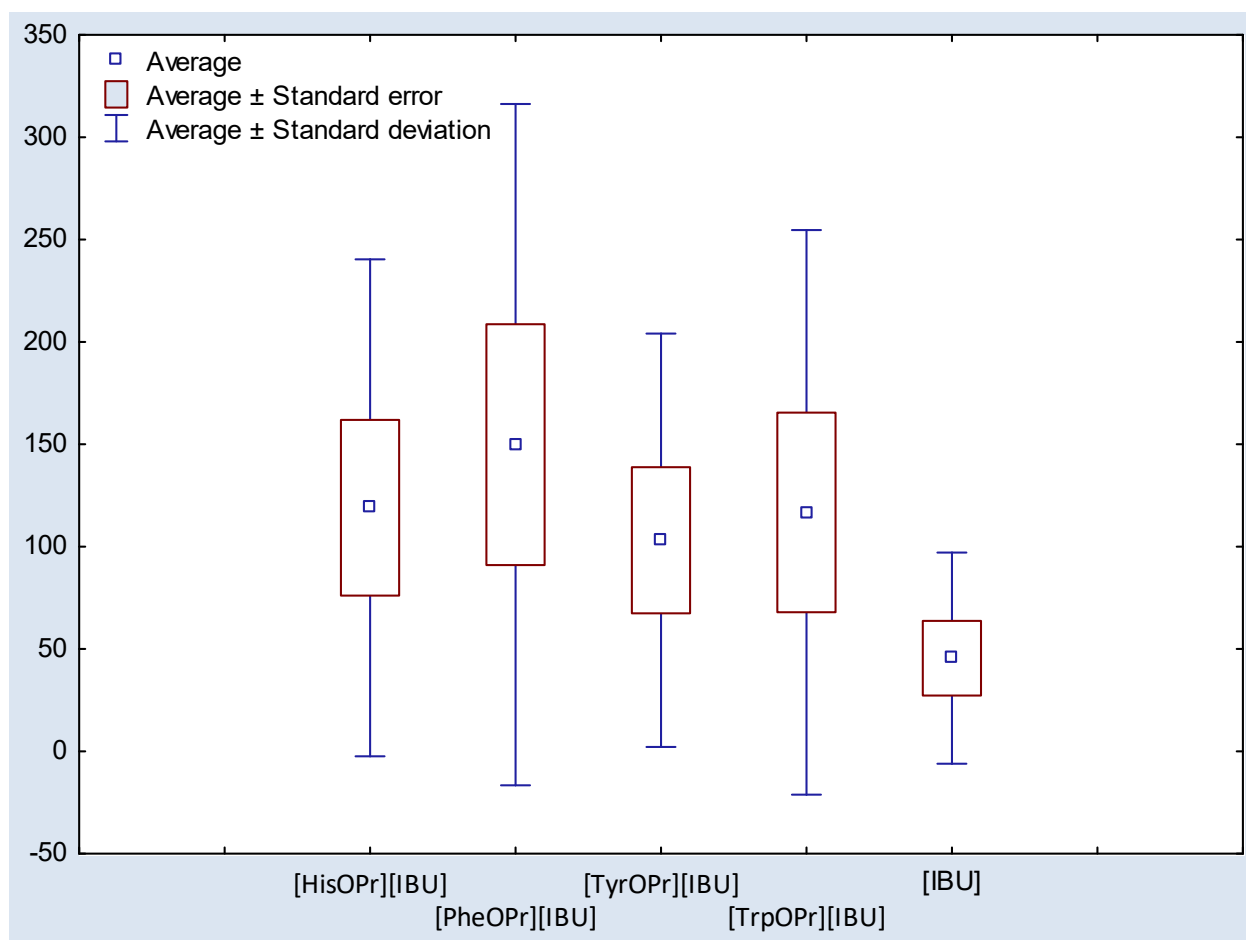

**Figure S26.** The box plot of cumulative mass for ibuprofen and amino acid propyl ester ibuprofenates during the 24-hour permeation.

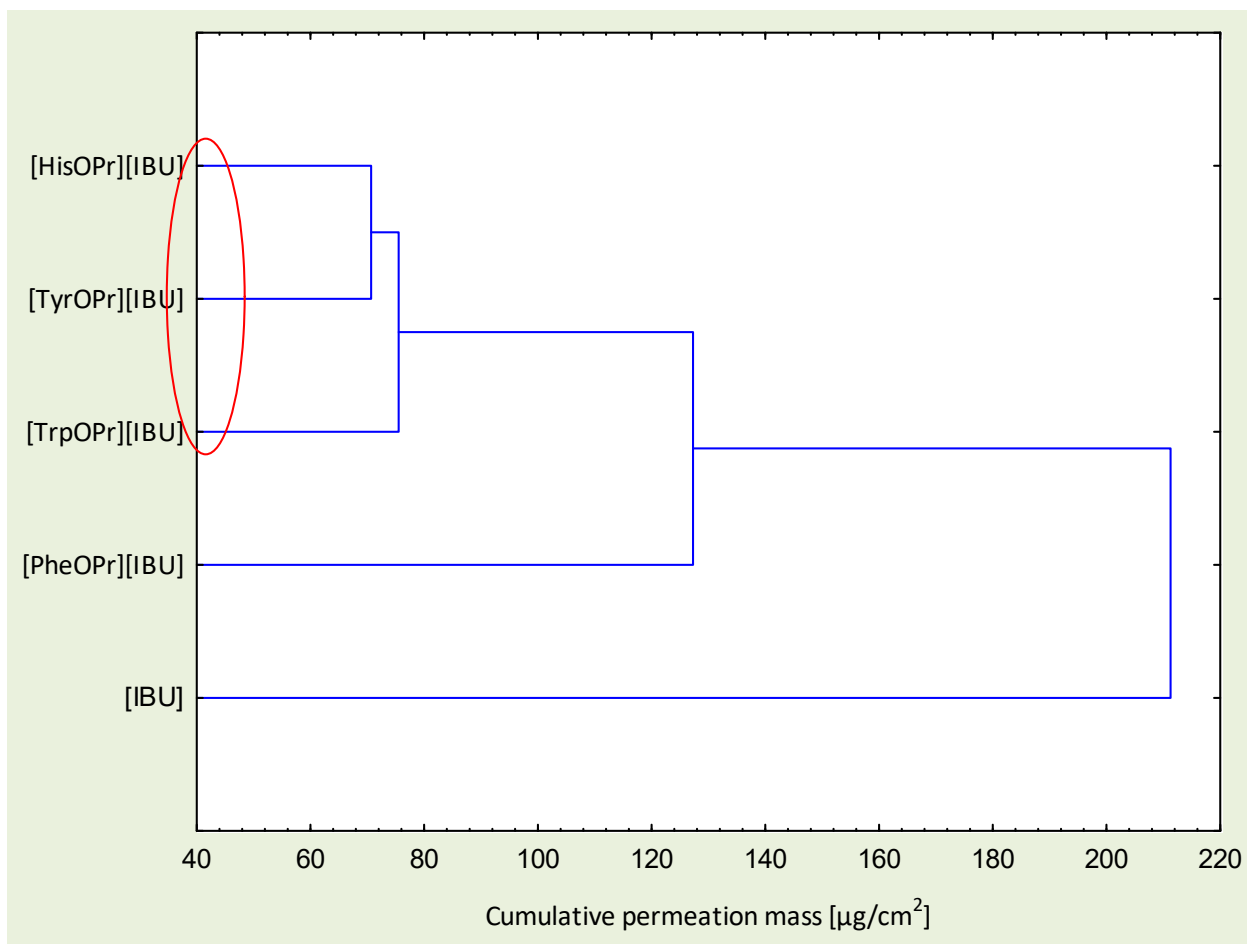

**Figure S27.** Cluster analysis graph for the mean accumulated mass for ibuprofen and amino acid propyl ester ibuprofenates during the 24-hour permeation. Compounds with similar and highest permeation values are marked in the red circle.



**Table S1.** Significant differences in the cumulative mass between all analyzed compounds, taking into account all time points during the entire 24 h permeation, were estimated by the Wilcoxon test.

|               | [HisOPr][IBU] | [PheOPr][IBU]                   | [TyrOPr][IBU]                   | [TrpOPr][IBU]                    | [IBU]                            |
|---------------|---------------|---------------------------------|---------------------------------|----------------------------------|----------------------------------|
| [HisOPr][IBU] |               | Z = 1.8201<br><i>p</i> = 0.0870 | Z = 1.8201<br><i>p</i> = 0.0870 | Z = 0.7001<br><i>p</i> = 0.4838  | Z = 2.3804<br><i>p</i> = 0.0172* |
| [PheOPr][IBU] |               |                                 | Z = 1.6800<br><i>p</i> = 0.0928 | Z = 2.5205<br><i>p</i> = 0.0117* | Z = 2.5205<br><i>p</i> = 0.0117* |
| [TyrOPr][IBU] |               |                                 |                                 | Z = 0,4200<br><i>p</i> = 0.18744 | Z = 2.5205<br><i>p</i> = 0.0117* |
| [TrpOPr][IBU] |               |                                 |                                 |                                  | Z = 2.3804<br><i>p</i> = 0.0172* |

# TRANSDERMAL PATCHES

## The ATR-FTIR spectra of patches

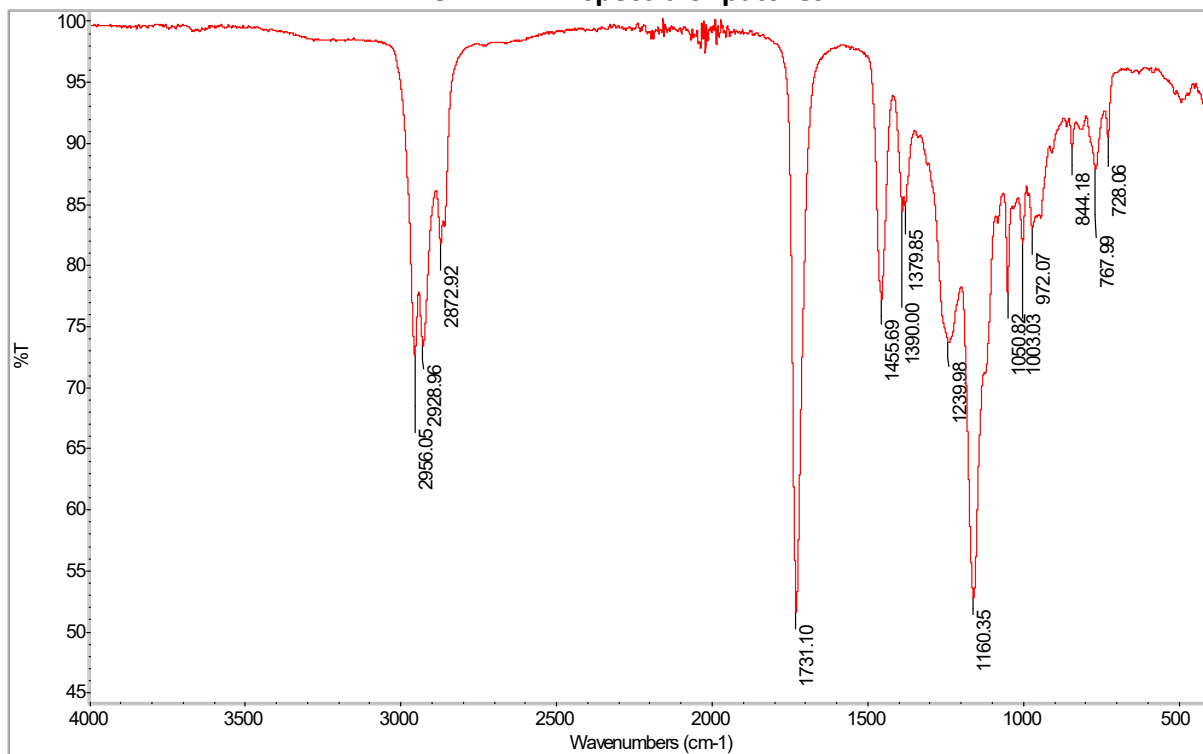

Figure S28. FTIR spectrum of the adhesive layer of the patch without API.

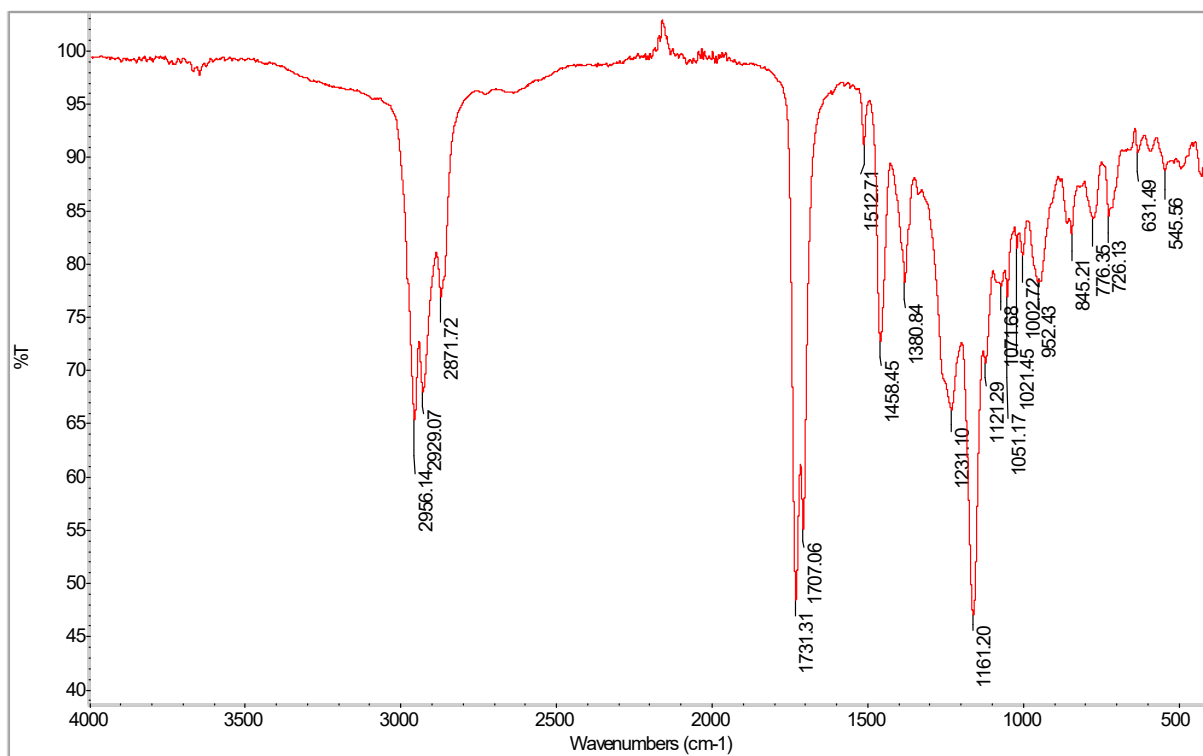

Figure S29. FTIR spectrum of the adhesive layer of the patch with ibuprofen.

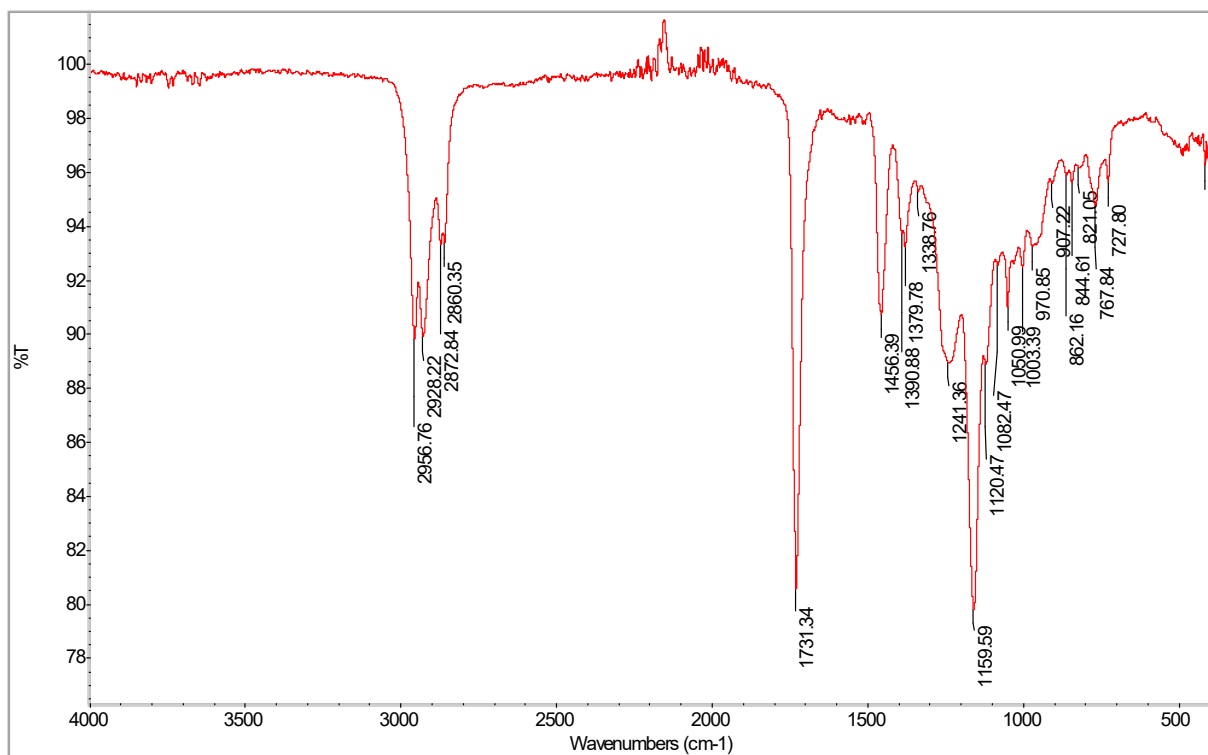

**Figure S30.** FTIR spectrum of the patch with sodium ibuprofenate.

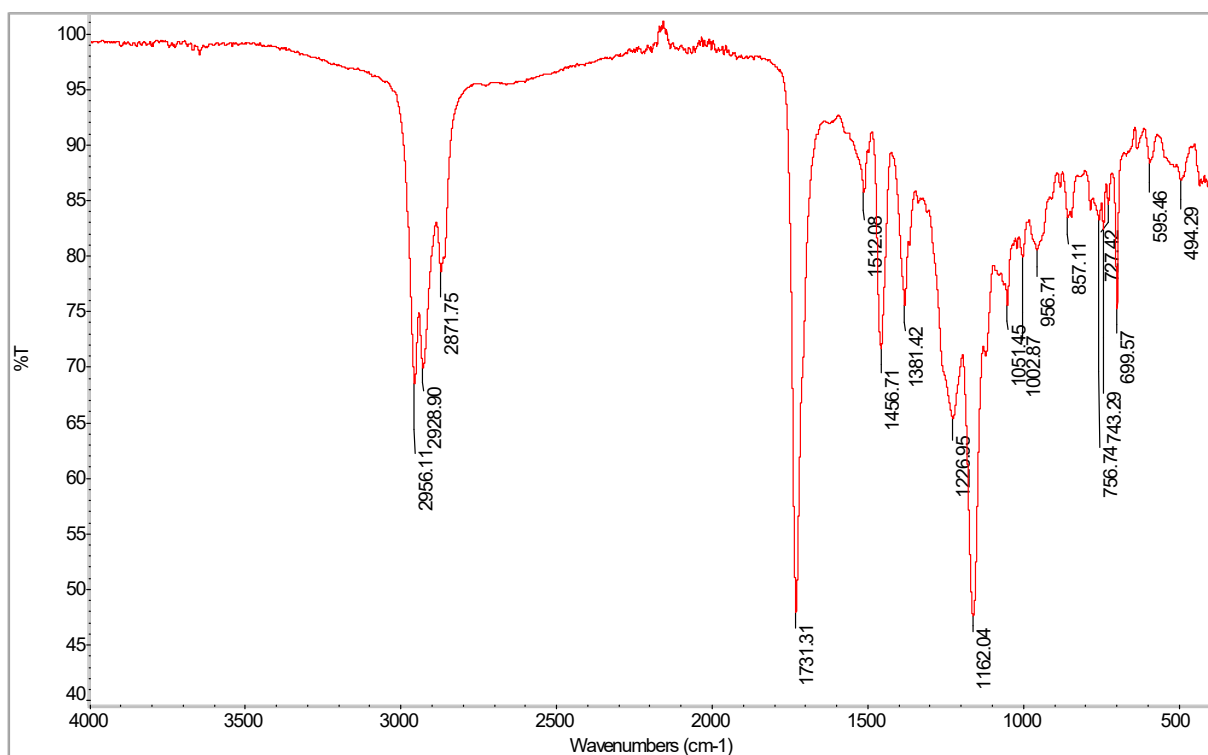

**Figure S31.** FTIR spectrum of the patch L-phenylalanine propyl ester ibuprofenate.

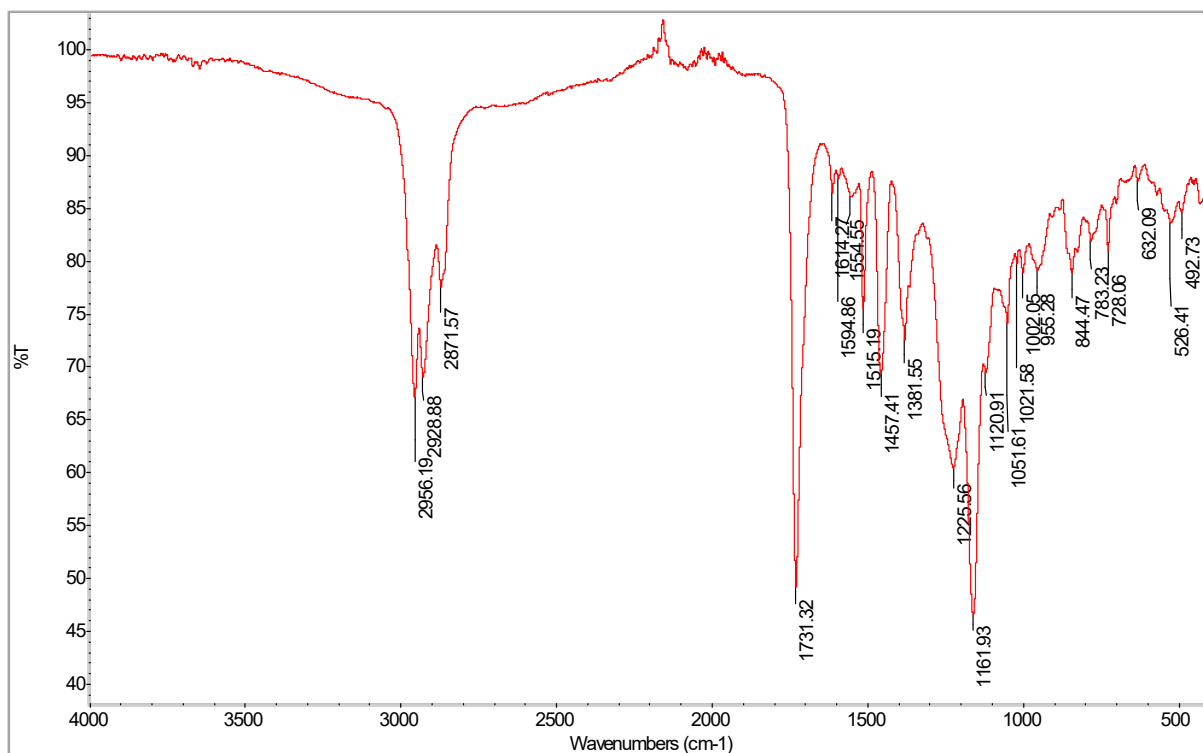

Figure S32. FTIR spectrum of the patch L-tyrosine propyl ester ibuprofenate.

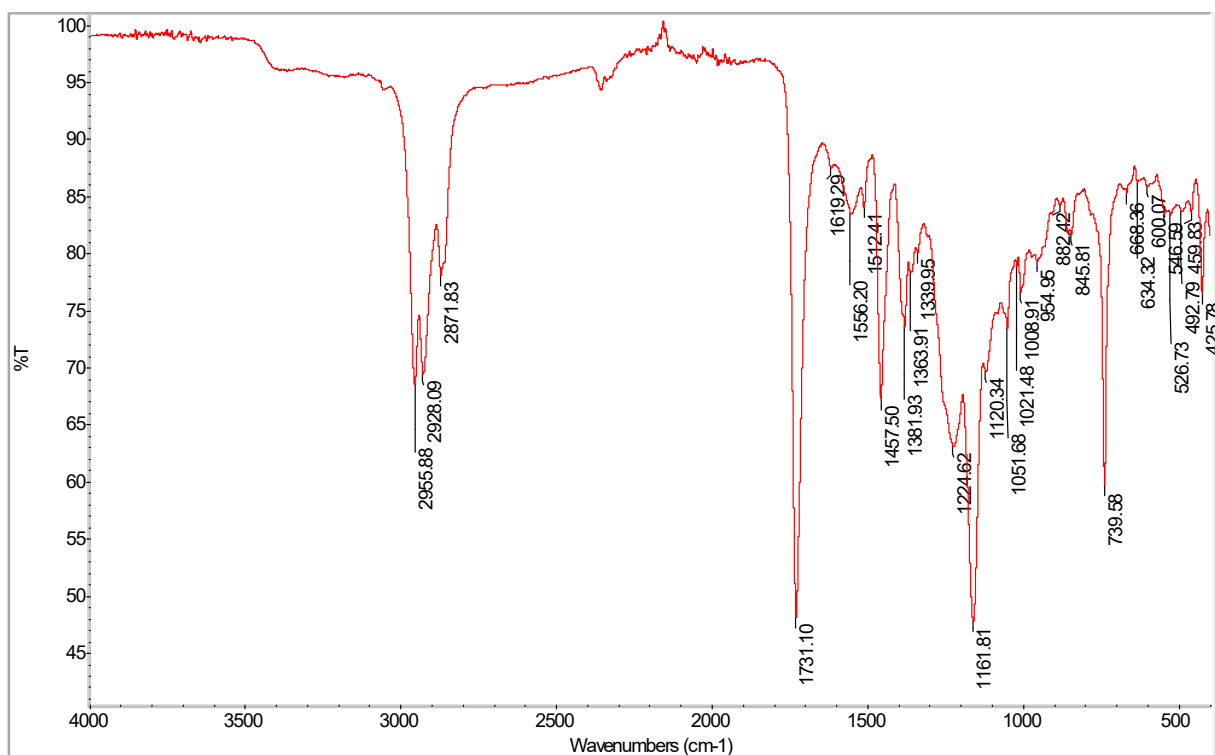

Figure S33. FTIR spectrum of the patch L-tryptophane propyl ester ibuprofenate.

### The TG curves of patches

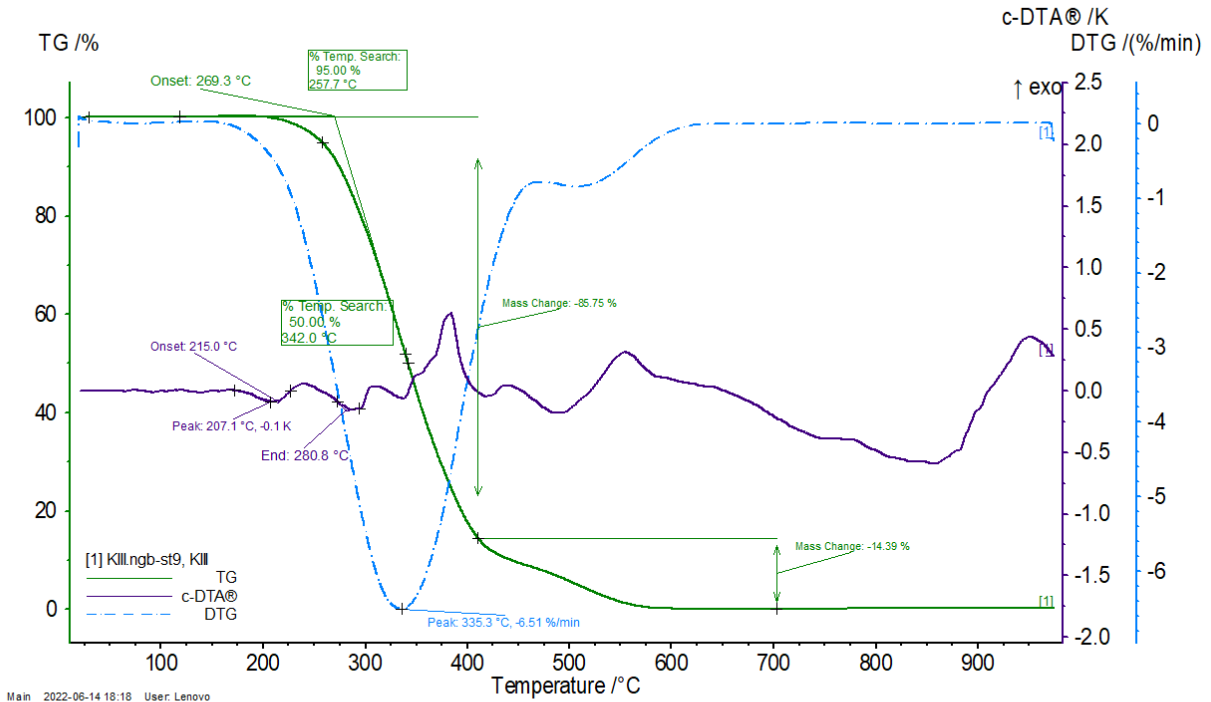

**Figure S34.** The TG, DTG, and c-DTA curves of the adhesive layer of the patch without API.

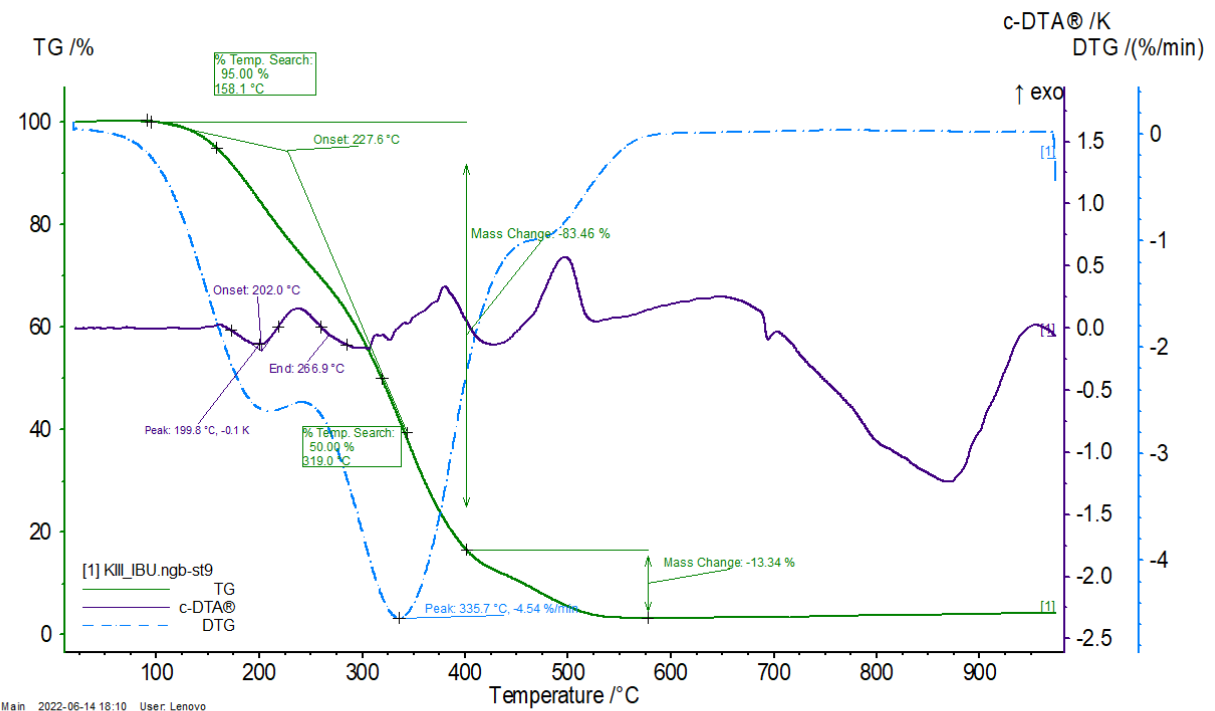

**Figure S35.** The TG, DTG, and c-DTA curves of the adhesive layer of the patch with ibuprofen.

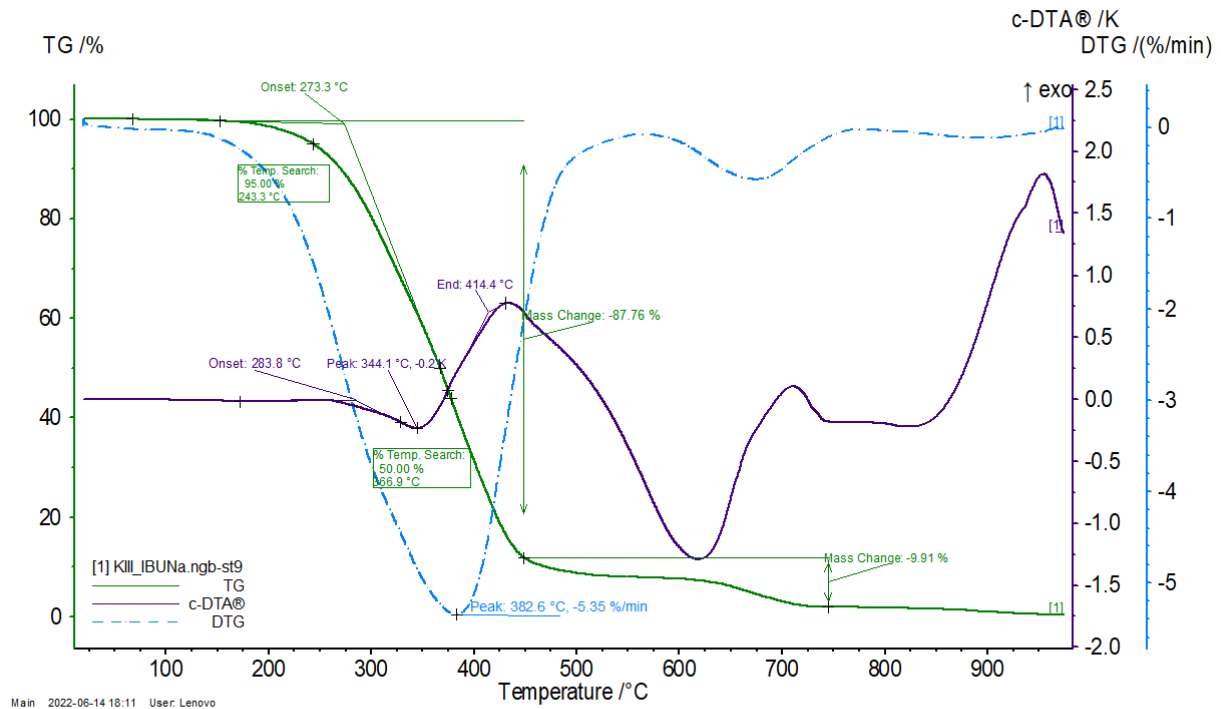

**Figure S36.** The TG, DTG, and c-DTA curves of the patch with sodium ibuprofenate.

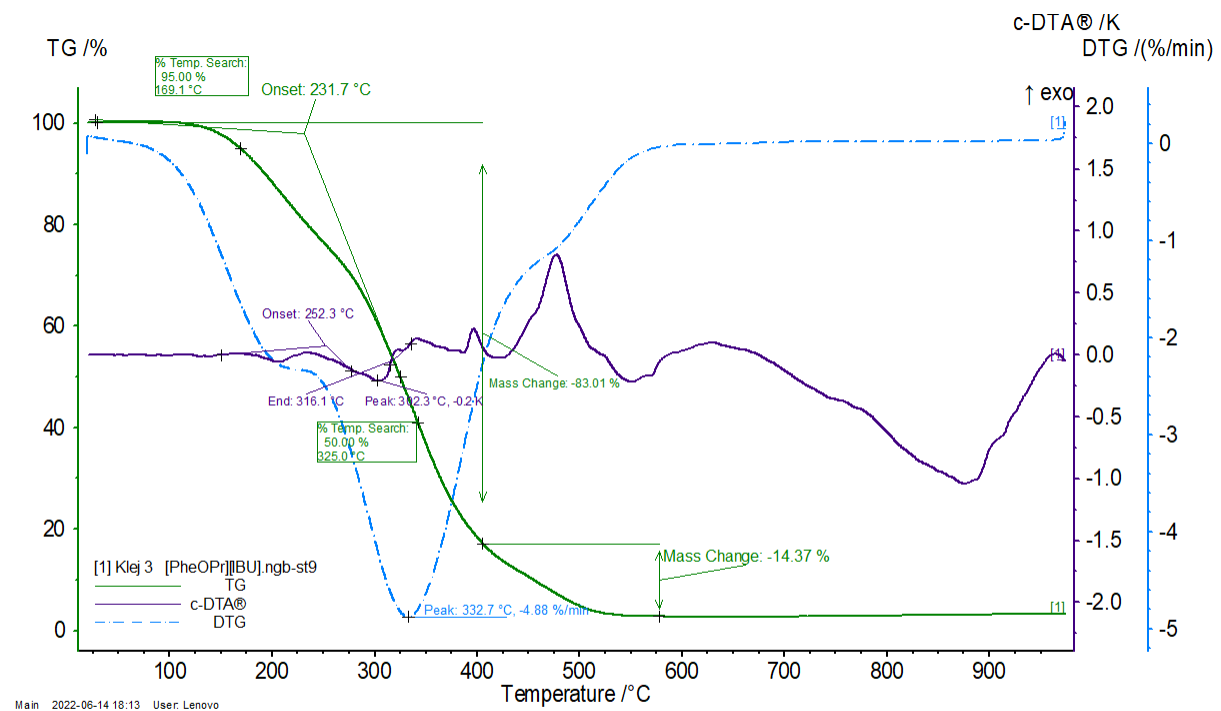

**Figure S37.** The TG, DTG, and c-DTA curves of the patch L-phenylalanine propyl ester ibuprofenate.

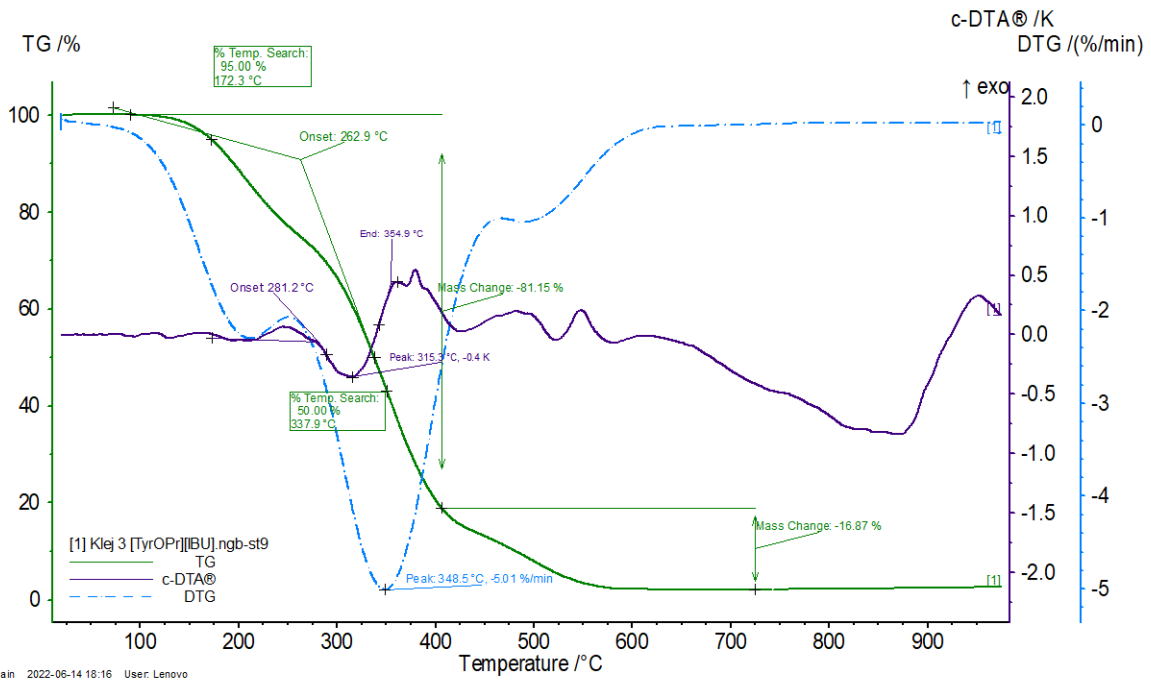

Figure S38. The TG, DTG, and c-DTA curves of the patch L-tyrosine propyl ester ibuprofenate.

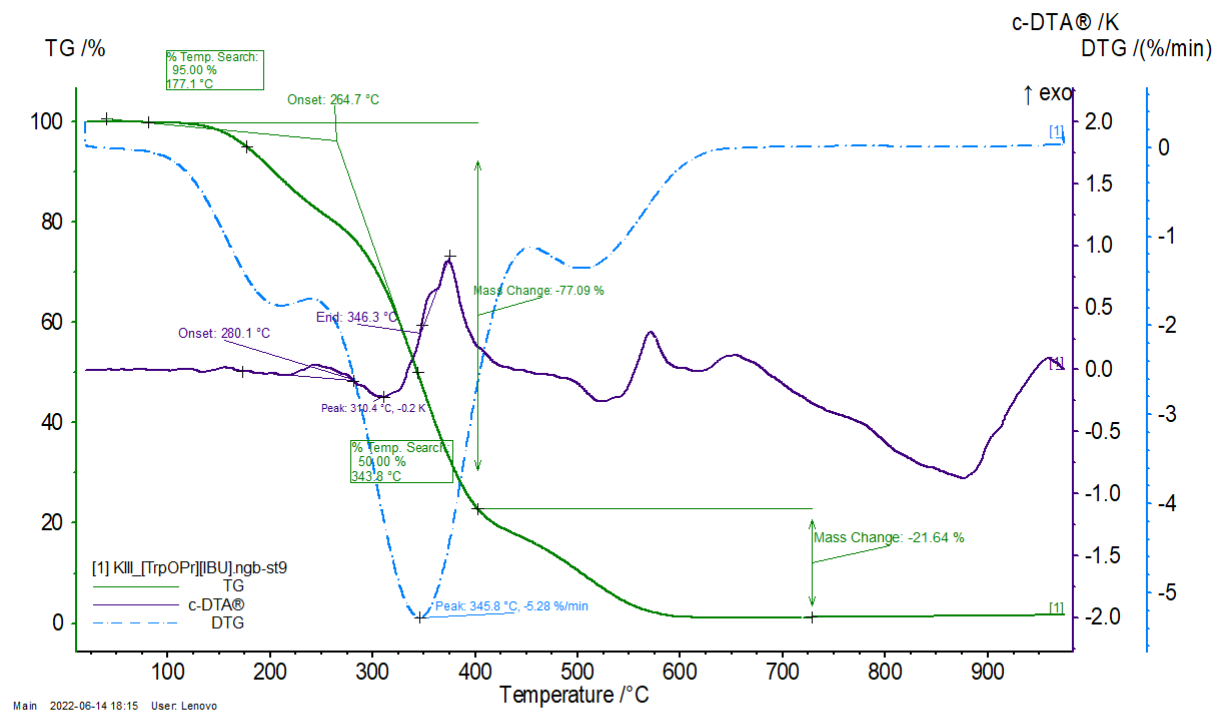

Figure S39. The TG, DTG, and c-DTA curves of the patch L-tryptophan propyl ester ibuprofenate.

### The DSC curves of patches

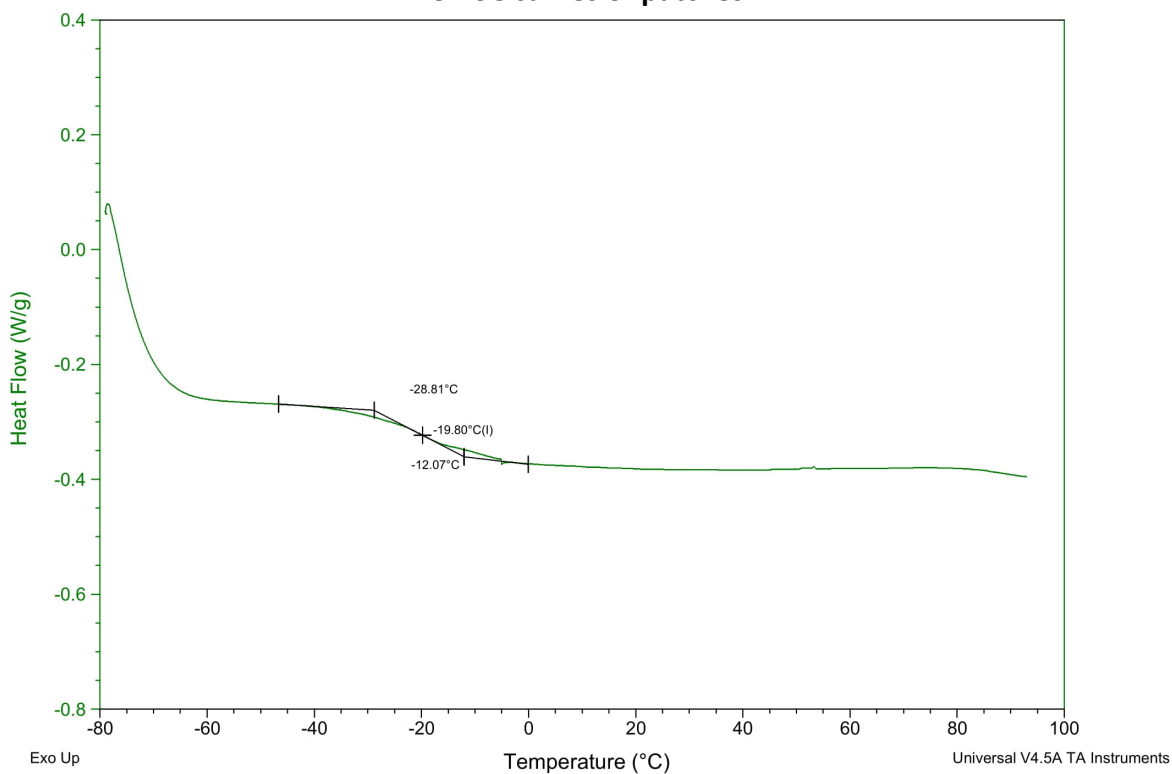

**Figure S40.** The DSC curves of the adhesive layer of the patch without API.

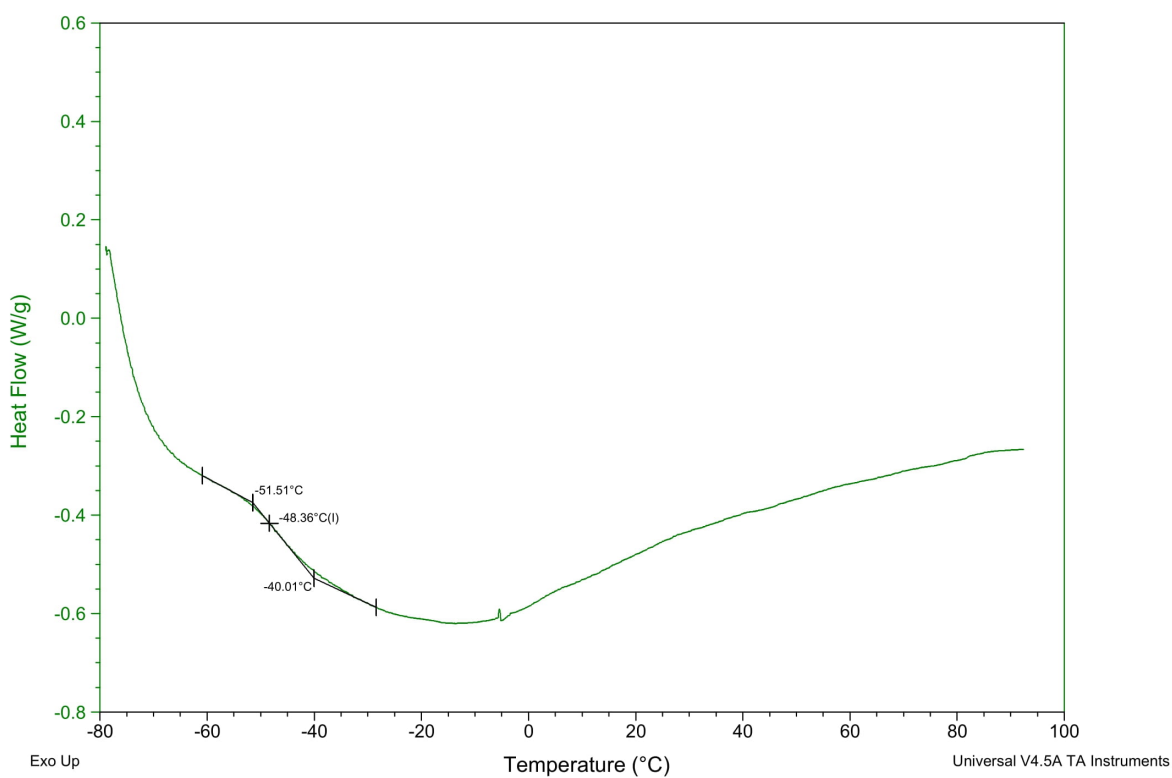

**Figure S41.** The DSC curves of the adhesive layer of the patch with ibuprofen.



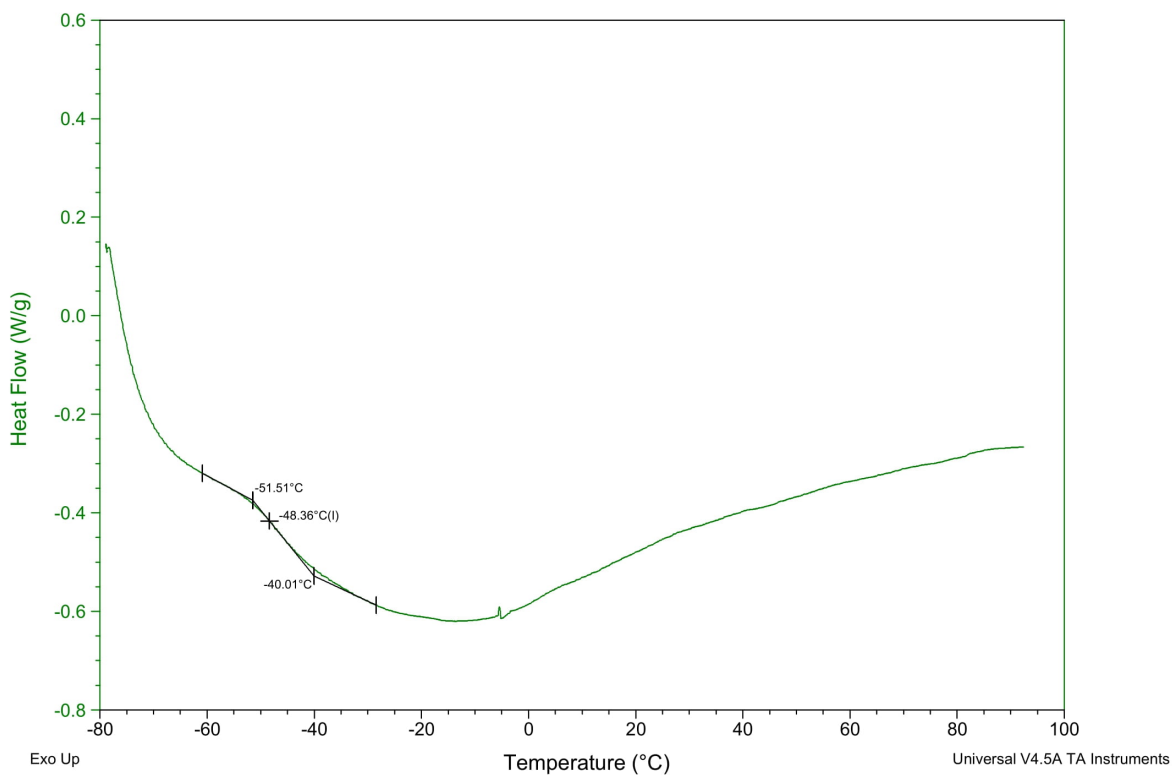

**Figure S42.** The DSC curves of the adhesive layer of the patch with sodium ibuprofenate.

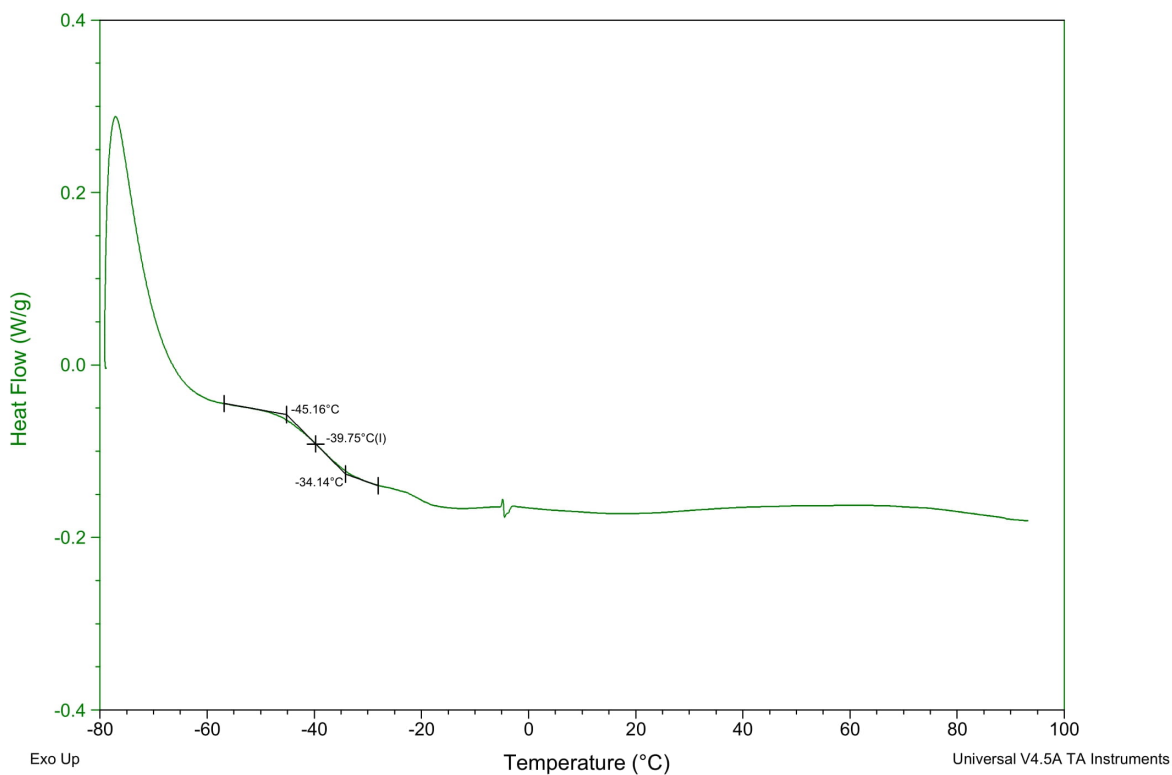

**Figure S43.** The DSC curves of the adhesive layer of the patch L-phenylalanine propyl ester ibuprofenate.

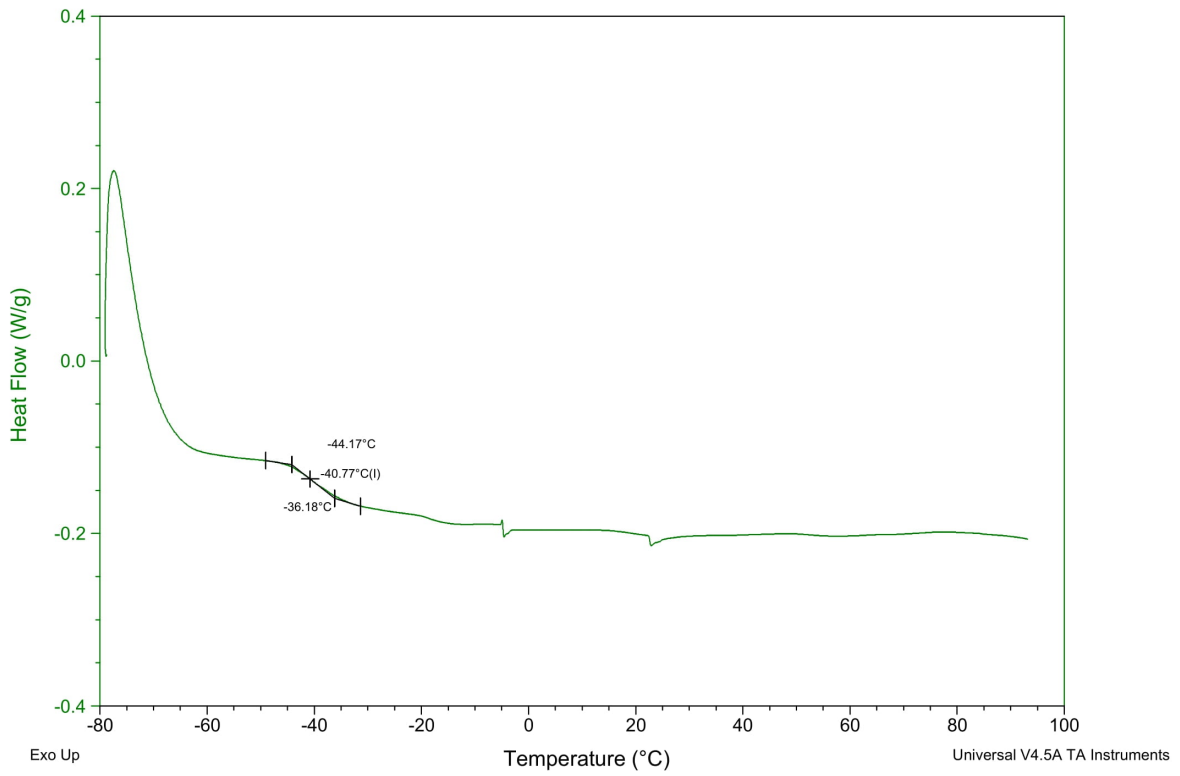

**Figure S44.** The DSC curves of the adhesive layer of the patch L-tyrosine propyl ester ibuprofenate.

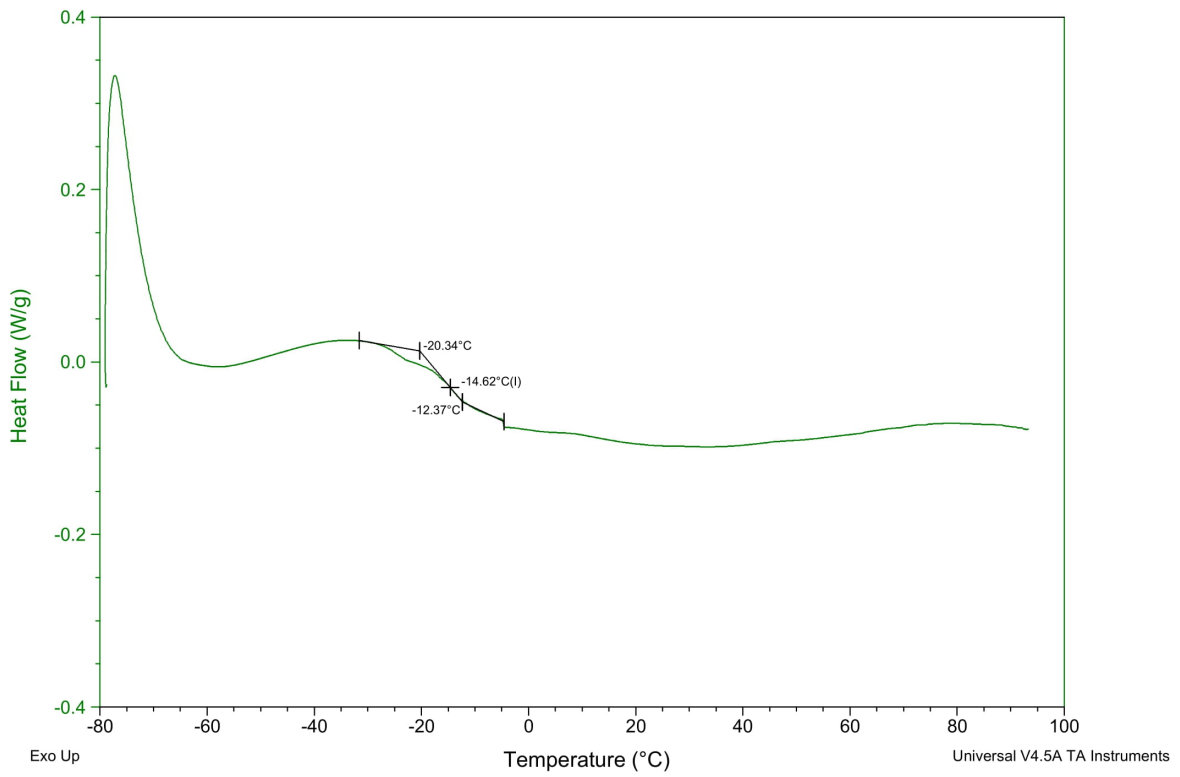

**Figure S45.** The DSC curves of the adhesive layer of the patch L-tryptophan propyl ester ibuprofenate.

## Characteristics of obtained transdermal patches

### Skin permeation results

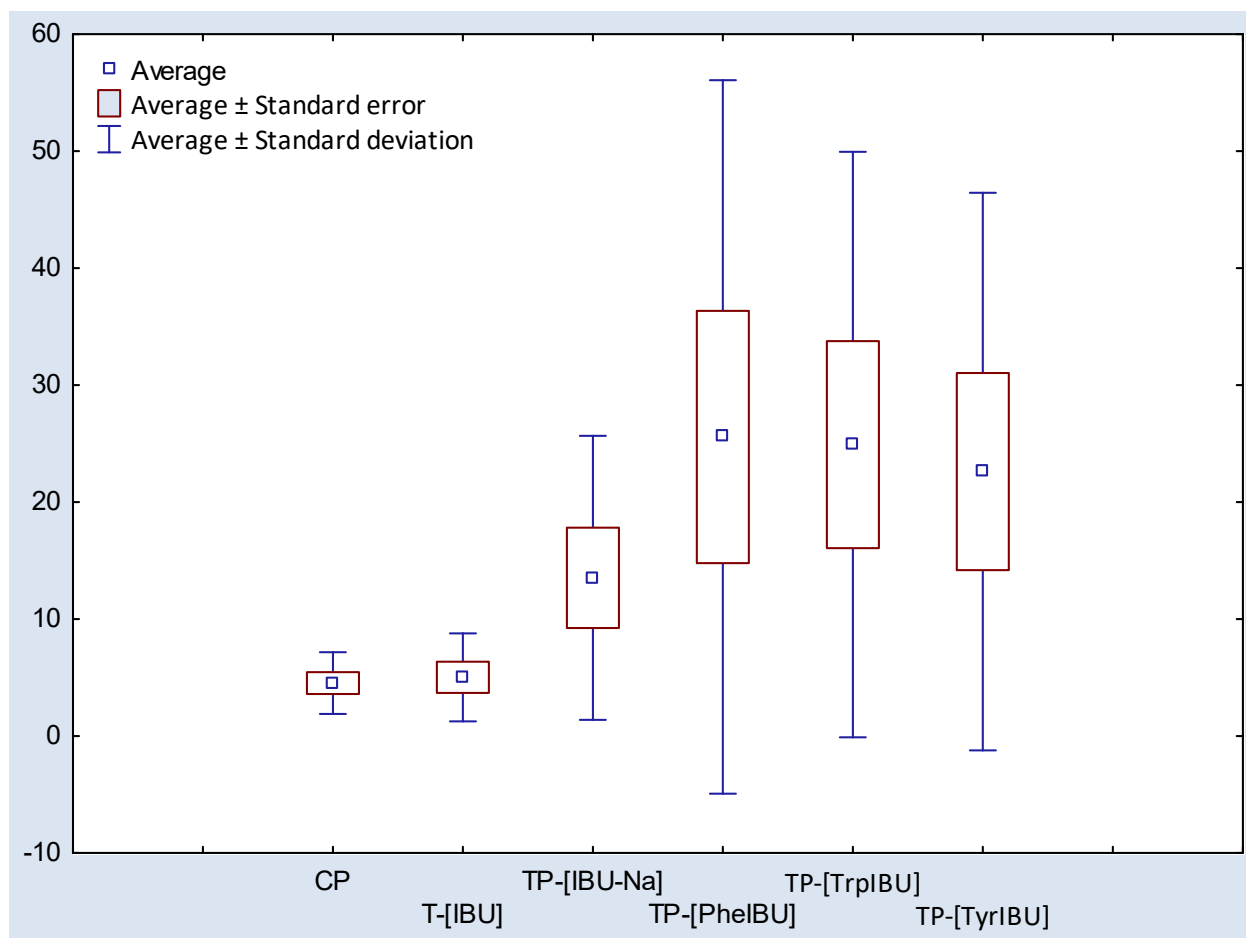

**Figure S46.** The box plot of cumulative mass for ibuprofen and amino acid propyl ester ibuprofenates permeation profiles for obtained transdermal patches during the 24-hour permeation; CP – commercial product.

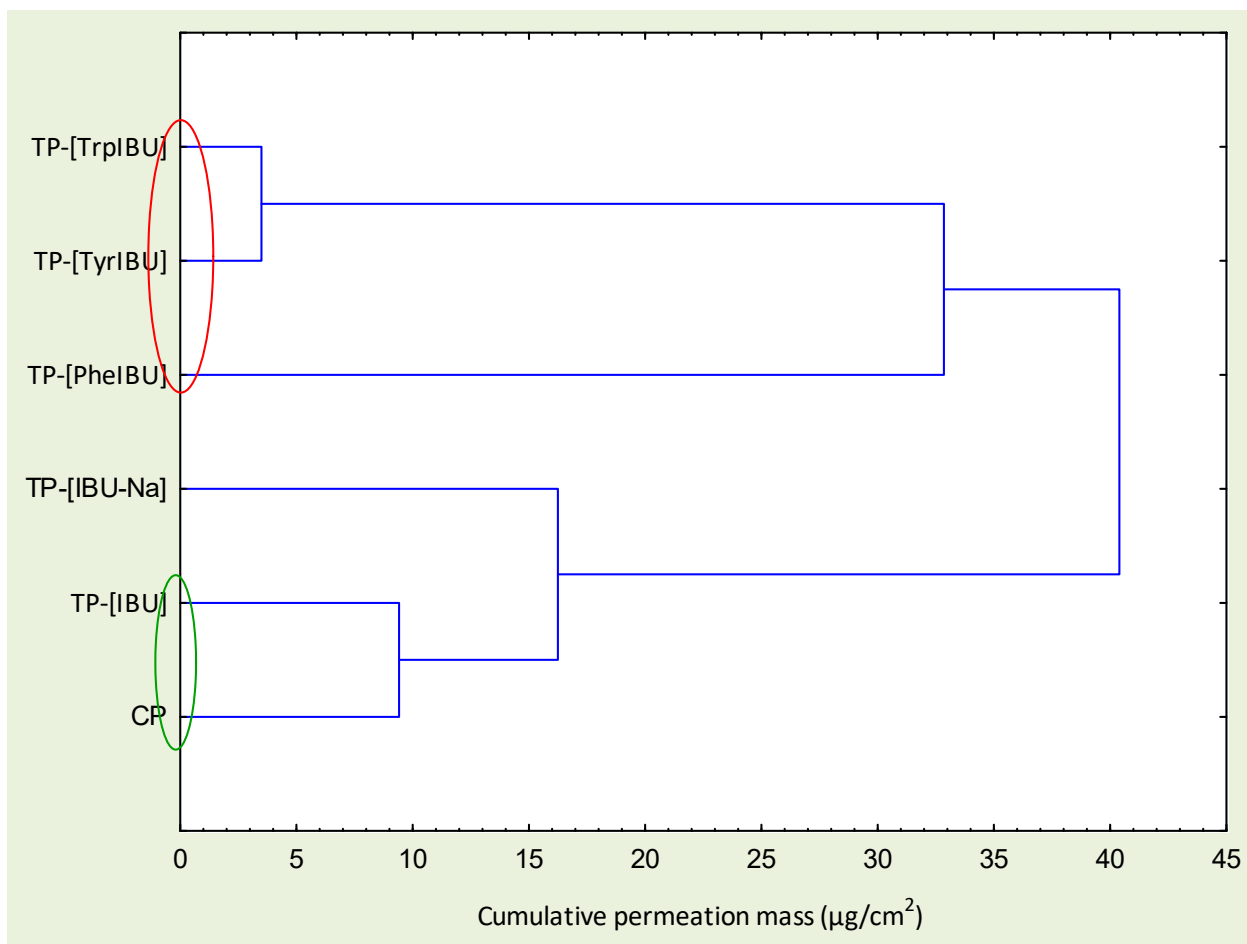

**Figure S47.** Cluster analysis graph for the mean accumulated mass for ibuprofen and amino acid propyl ester ibuprofenates permeation profiles for obtained transdermal patches during the 24-hour permeation test, CP – commercial product. Compounds with similar permeation values are marked in different color circles; CP – commercial product.

**Table S2.** Significant differences in the cumulative mass between all analyzed compounds, for ibuprofen and amino acid propyl ester ibuprofenates permeation profiles from obtained transdermal patches during the 24-hour permeation, were estimated by the Wilcoxon test; CP – commercial product.

|                      | TP-<br>[PheOPr][IBU] | TP-<br>[TyrOPr][IBU]             | TP-<br>[TrpOPr][IBU]             | TP-[IBU][Na]                     | TP-[IBU]                         | CP                               |
|----------------------|----------------------|----------------------------------|----------------------------------|----------------------------------|----------------------------------|----------------------------------|
| TP-<br>[PheOPr][IBU] |                      | Z = 2.5205<br><i>p</i> = 0.0117* | Z = 2.5205<br><i>p</i> = 0.0117* | Z = 1.6803<br><i>p</i> = 0.0928  | Z = 2.3804<br><i>p</i> = 0.0172* | Z = 1.9603<br><i>p</i> = 0.0499* |
| TP-<br>[TyrOPr][IBU] |                      |                                  | Z = 0.7001<br><i>p</i> = 0.4838  | Z = 2,5205<br><i>p</i> = 0.0117* | Z = 2,5205<br><i>p</i> = 0.0117* | Z = 2.1004<br><i>p</i> = 0.0356* |
| TP-<br>[TrpOPr][IBU] |                      |                                  |                                  | Z = 2,5205<br><i>p</i> = 0.0117* | Z = 2,5205<br><i>p</i> = 0.0117* | Z = 2.1004<br><i>p</i> = 0.0356* |
| TP-[IBU][Na]         |                      |                                  |                                  |                                  | Z = 0,1400<br><i>p</i> = 0.8886  | Z = 0.8401<br><i>p</i> = 0.4008  |
| TP-[IBU]             |                      |                                  |                                  |                                  |                                  | Z = 2.3804<br><i>p</i> = 0.0172* |
| CP                   |                      |                                  |                                  |                                  |                                  |                                  |
